# Supplementary material for: Fusarium-Derived Secondary Metabolites with Antimicrobial Effects
Source: MDPI journal article supplement (doi:10.3390/molecules28083424), 2023-04-13
Supplement: s1 [file s1]

## ***Fusarium*-derived secondary metabolites with antimicrobial effects**

Meijie Xu, Ziwei Huang, Wangjie Zhu, Yuanyuan Liu, Xuelian Bai \* and Huawei Zhang \*

### Contents

|                                                                                                                          |    |
|--------------------------------------------------------------------------------------------------------------------------|----|
| <b>Table S1.</b> Detail information for <i>Fusarium</i> -derived anti-Gram-positive bacterial SMs-----                   | 2  |
| <b>Table S2.</b> Detail information for <i>Fusarium</i> -derived anti-Gram-negative bacterial SMs-----                   | 5  |
| <b>Table S3.</b> Detail information for <i>Fusarium</i> -derived both anti-Gram-positive and anti-Gram-negative SMs----- | 6  |
| <b>Table S4.</b> Detail information for <i>Fusarium</i> -derived antifungal SMs-----                                     | 8  |
| <b>Table S5.</b> Detail information for <i>Fusarium</i> -derived both antibacterial and antifungal SMs-----              | 10 |
| <b>Table S6.</b> Detail information for <i>Fusarium</i> -derived antiviral SMs-----                                      | 14 |
| <b>Table S7.</b> Detail information for <i>Fusarium</i> -derived antiparasitic SMs-----                                  | 15 |
| References-----                                                                                                          | 17 |

Table S1. Detail information for *Fusarium*-derived anti-Gram-positive bacterial SMs.

| No. | Name                                                        | Strain                                             | Source                                                            | Bioactivity                                                                                                                                                                                                 | Ref. |
|-----|-------------------------------------------------------------|----------------------------------------------------|-------------------------------------------------------------------|-------------------------------------------------------------------------------------------------------------------------------------------------------------------------------------------------------------|------|
| 1   | fusariumins C                                               | <i>F. oxysporum</i> ZZP-R1                         | the coastal plant <i>R. madaio</i> Makino, China                  | potent activity against <i>S. aureus</i> with an MIC value of 6.25 μM                                                                                                                                       | [1]  |
| 2   | fusariumins D                                               |                                                    |                                                                   | moderate inhibitory effect on <i>S. aureus</i> with an MIC value of 25.0 μM                                                                                                                                 |      |
| 3   | A-108835                                                    | <i>F. compactu</i> AB 21941-103                    | an ant hill soil sample, Nigeria                                  | only scattered weak Gram-positive activity against some <i>S. aureus</i> and <i>Streptococcus</i> strains in the range of 6~50 μg/mL                                                                        | [2]  |
| 4   | A-108836                                                    |                                                    |                                                                   |                                                                                                                                                                                                             |      |
| 5   | enniatin Q                                                  | <i>F. tricinctum</i> Corda                         | the fruits of <i>Hordeum sativum</i> Jess                         | mild activity against <i>S. aureus</i>                                                                                                                                                                      | [3]  |
| 6   | enniatin E                                                  | <i>Fusarium</i> sp. FO-1305                        | Soil, Japan                                                       | weak activity against Gram-positive bacteria such as <i>S. aureus</i> , <i>B. subtilis</i> , <i>B. cereus</i> and <i>M. luteus</i> and very weak activity against <i>C. albicans</i> and <i>P. oryzae</i> . | [4]  |
| 7   | enniatin F                                                  |                                                    |                                                                   |                                                                                                                                                                                                             |      |
| 8   | enniatin H                                                  | <i>Fusarium</i> sp. TP-G1                          | the root of <i>Dendrobium officinale</i> Kimura et Migo           | weak antibacterial activities against <i>S. aureus</i> and MRSA with MIC value of 32 μg/mL                                                                                                                  | [5]  |
| 9   | enniatin I                                                  |                                                    |                                                                   | weak antibacterial activities against <i>S. aureus</i> and MRSA with MICs of 8 μg/mL and 16 μg/mL, respectively                                                                                             |      |
| 10  | enniatin MK1688                                             |                                                    |                                                                   |                                                                                                                                                                                                             |      |
| 11  | beauvericin A                                               |                                                    |                                                                   | good antibacterial activities against <i>S. aureus</i> and MRSA with MIC value of 2.0 μg/mL                                                                                                                 |      |
| 12  | trichosetin                                                 | <i>F. oxysporum</i> FKI-4553 -                     |                                                                   | antimicrobial activity, particularly against Gram-positive bacteria, including methicillin-sensitive and -resistant <i>S. aureus</i>                                                                        | [6]  |
| 13  | epi-trichosetin                                             |                                                    |                                                                   |                                                                                                                                                                                                             |      |
| 14  | lateritin                                                   | <i>Fusarium</i> sp. 2TnP1-2                        | The petioles of <i>Trewia nudiflora</i> L. (Euphorbiaceae), China | possess antibacterial activity against <i>Staphylococcus aureus</i>                                                                                                                                         | [7]  |
| 15  | oxysporizoline                                              | <i>F. oxysporum</i>                                | the marine mudflat, Korea                                         | weak antibacterial activity against MRSA and MDRSA, with MICs of 6.25 μg/mL                                                                                                                                 | [8]  |
| 16  | bromomethylchlamydosporol A                                 | <i>F. tricinctum</i>                               | the edible marine brown alga <i>Sargassum ringgoldium</i> , Korea | an MIC of 15.6 μg/mL against <i>S. aureus</i> , MRSA, and MDRSA (mild antibacterial activity)                                                                                                               | [9]  |
| 17  | bromomethylchlamydosporol B                                 |                                                    |                                                                   |                                                                                                                                                                                                             |      |
| 18  | chlamydosporol                                              | <i>F. oxysporum</i>                                | the marine mudflat, Korea                                         | weak antibacterial activity against MRSA and MDRSA, with MICs of 31.5 μg/mL                                                                                                                                 | [8]  |
|     |                                                             | <i>F. tricinctum</i>                               | the edible marine brown alga <i>Sargassum ringgoldium</i> , Korea | an MIC of 31.5 μg/mL against <i>S. aureus</i> and 62.5 μg/mL against MRSA                                                                                                                                   | [9]  |
| 19  | 4-methoxy-6-((E)-4,6-dimethyloct-2-en-2-yl) -2H-pyran-2-one | <i>F. Petroliphilum</i> FEP 16                     | <i>Posidonia oceanica</i> shoots, France                          | moderate activity against MRSA with an MIC of 32 μg/mL                                                                                                                                                      | [10] |
| 20  | trans-Dihydrofusarubin                                      | <i>F. solani</i> B3H, B3K, and BP15-8 (NRRL 15980) | fibrous roots of citrus trees                                     | significant activity against <i>S. aureus</i> at MIC values <4 μg/mL                                                                                                                                        | [11] |
| 21  | 3-O, 9-O-Metylfusarubin                                     |                                                    |                                                                   |                                                                                                                                                                                                             |      |
| 22  | 5-O-Methyljavanicin                                         |                                                    |                                                                   |                                                                                                                                                                                                             |      |
| 23  | anhydrofusarubin                                            | <i>F. solani</i> B3H, B3K, and BP15-8 (NRRL 15980) | fibrous roots of citrus trees                                     | significant activity against <i>S. aureus</i> at MIC values <4 μg/mL                                                                                                                                        | [11] |
|     |                                                             | <i>Fusarium</i> sp. PSU-F135                       | Marine brown alga <i>Colpomenia sinuosa</i>                       | antimycobacterial (against <i>M. tuberculosis</i> H37Ra, MIC 87 μM) activities                                                                                                                              | [12] |

|    |                                                                                                         |                                                     |                                                           |                                                                                                                                                                                                                                                                                                                                                      |      |
|----|---------------------------------------------------------------------------------------------------------|-----------------------------------------------------|-----------------------------------------------------------|------------------------------------------------------------------------------------------------------------------------------------------------------------------------------------------------------------------------------------------------------------------------------------------------------------------------------------------------------|------|
| 24 | 5,8-Dihydroxy-2-methoxy-6-hydroxymethyl-7-(2-hydroxypropyl)-1,4-naphthalenedione                        | <i>F. solani</i> B3H, B3K, and BP15-8 (NRRL 15980)  | fibrous roots of citrus trees                             | significant activity against <i>S. aureus</i> at MIC values <4 µg/mL                                                                                                                                                                                                                                                                                 | [11] |
| 25 | 8- <i>O</i> -Methyljavanicin                                                                            | <i>F. oxysporum</i> HC-7-1 (ATCC 64432)             | <i>Hyrtios proteus</i> sponge                             | significant activity against <i>S. aureus</i> at MIC values <4 µg/mL                                                                                                                                                                                                                                                                                 | [11] |
| 26 | 2,3-Dihydro-5,8-dihydroxy-6-methoxy-2-hydroxymethyl-3-(2-hydroxypropyl)-1,4-naphthalenedione            | <i>F. solani</i> B3H, B3K, and BP15-8 (NRRL 15980)  | fibrous roots of citrus trees                             | significant activity against <i>S. aureus</i> and <i>S. pyogenes</i> , at MIC values <4 µg/mL                                                                                                                                                                                                                                                        | [11] |
| 27 | 2,3-Dihydro-5-hydroxy-4-hydroxymethyl-8-methoxy-3-methylnaphtho(1,2-b) furan-6,9-dione                  |                                                     |                                                           | significant activity against <i>Staphylococcus aureus</i> and <i>S. pyogenes</i> , at MIC values <4 µg/mL;                                                                                                                                                                                                                                           | [11] |
| 28 | 9 $\alpha$ -hydroxyhalorosellinia A                                                                     | <i>Fusarium</i> sp. PSU-F14                         | a gorgonian sea fan                                       | antimycobacterial (against <i>M. tuberculosis</i> H37Ra, MIC 38.57 µM) activity                                                                                                                                                                                                                                                                      | [12] |
| 29 | nigrosporin B                                                                                           |                                                     |                                                           | antimycobacterial (against <i>M. tuberculosis</i> H37Ra, MIC 41 µM) activity                                                                                                                                                                                                                                                                         | [12] |
| 30 | 5-hydroxy-3-methoxydihydrofusarubin A                                                                   | <i>Fusarium</i> sp. BCC14842                        | Bamboo leaf, Thailand                                     | anti-TB ( <i>M. tuberculosis</i> ) with MIC of 50 µg/mL                                                                                                                                                                                                                                                                                              | [13] |
| 31 | dihydronaphthalenone diastereomer                                                                       |                                                     |                                                           | anti-TB ( <i>M. tuberculosis</i> ) with MIC of 25 µg/mL                                                                                                                                                                                                                                                                                              | [13] |
| 32 | 3- <i>O</i> -methylfusarubin                                                                            | <i>Fusarium</i> sp. BCC14842<br><i>F. solani</i> A2 | -                                                         | anti-TB ( <i>M. tuberculosis</i> ) with MIC of 50 µg/mL                                                                                                                                                                                                                                                                                              | [13] |
| 33 | 3,6,9-trihydroxy-7-methoxy-4,4-dimethyl-3,4-dihydro-1 <i>H</i> -benzo[ <i>g</i> ]isochromene-5,10-dione | <i>F. solani</i> A2                                 | medicinal plant <i>Glycyrrhiza glabra</i> , India         | moderate activity against <i>M. tuberculosis</i> strain H37Rv with MIC value of 64 µg/mL; moderate anti-bacterial activity against <i>S. aureus</i> with MIC value of 32 µg/mL; against <i>B. cereus</i> and <i>S. pyogenes</i> with MIC of <1 µg/mL as compared to ciprofloxacin whose MIC against these strains is 0.15 and 10 µg/mL, respectively | [14] |
| 34 | linoleic acid                                                                                           | <i>F. equiseti</i> SCSIO 41019                      | Sponge ( <i>Calyspongia</i> sp.), China                   | weak antibacterial activities against SA and MRSA with MIC values of 62.5, 125 µg/mL, respectively                                                                                                                                                                                                                                                   | [15] |
| 35 | <i>epi</i> -equisetin                                                                                   | <i>F. equiseti</i> SCSIO 41019                      | Sponge ( <i>Calyspongia</i> sp.), China                   | strongest antibacterial activities against <i>S. aureus</i> and MRSA with an MIC value of 31.2 µg/mL                                                                                                                                                                                                                                                 | [15] |
|    |                                                                                                         | <i>F. equiseti</i> AGR12                            | the stem of <i>Rhizophora stylosa</i> Griff               | remarkable antimicrobial activities against <i>B. subtilis</i> and <i>S. aureus</i> , with MIC value of 32 µg/mL                                                                                                                                                                                                                                     | [16] |
| 36 | (-)-4, 6'-anhydrooxysporidinone                                                                         | <i>F. oxysporum</i>                                 | the bark of <i>C. kanehirae</i> , Taiwan Province         | showed weak anti-MRSA activity (MIC=100 µg/mL) and moderate anti-BS ( <i>B. subtilis</i> ) activity (MIC=25 µg/mL).                                                                                                                                                                                                                                  | [17] |
| 37 | fusaroxazin                                                                                             | <i>F. oxysporum</i>                                 | <i>V. faba</i> , Egypt                                    | significant antibacterial activity towards <i>S. aureus</i> (IZD 14.8 mm and MIC 5.3 µg/mL) and <i>B. cereus</i> (IZD 18.9 mm and MIC 3.7 µg/mL), in comparison to ciprofloxacin (IZDs 16.9 and 20.5 mm; MICs 3.9 and 2.3 µg/mL, respectively)                                                                                                       | [18] |
| 38 | neomangicol B                                                                                           | <i>Fusarium</i> sp. CNC-477                         | the surface of driftwood collected in the Bahamas Islands | antibacterial activity similar to that of the known antibiotic, gentamycin, against the Gram-positive bacterium <i>B. subtilis</i>                                                                                                                                                                                                                   | [19] |
| 39 | SMA93                                                                                                   | <i>F. proliferatum</i> ZS07                         | Longhorned grasshoppers,                                  | antibacterial effect against <i>B. subtilis</i> with MIC value of 6.25 µg/mL                                                                                                                                                                                                                                                                         | [20] |

|    |                                                                   |                              |                                             |                                                                                                                                                         |      |
|----|-------------------------------------------------------------------|------------------------------|---------------------------------------------|---------------------------------------------------------------------------------------------------------------------------------------------------------|------|
| 40 | 6- <i>O</i> -methyl SMA93                                         |                              | China                                       | antibacterial effect against <i>B. subtilis</i> with MIC value of 12.5 µg/mL                                                                            |      |
| 41 | rhodolamprometrin                                                 |                              |                                             | antibacterial effect against <i>B. subtilis</i> with ZOI of 24.8mm and MIC value of 3.13 µg/mL                                                          |      |
| 42 | cyclonerodiol                                                     | <i>F. avenaceum</i> SF-1502  | Soil                                        | stronger antibacterial activity against <i>B. megaterium</i> than the positive controls, the clinical drugs, ampicillin, erythromycin, and streptomycin | [21] |
| 43 | epicyclonerodiol oxide                                            |                              |                                             | against <i>B. megaterium</i> with ampicillin and erythromycin, and stronger than streptomycin                                                           |      |
| 44 | 4,5-dihydroascochlorin                                            | <i>Fusarium</i> sp.          | -                                           | activity against <i>B. megaterium</i>                                                                                                                   | [22] |
| 45 | fusariumnol A                                                     | <i>F. proliferatum</i> 13294 | wheat tissue                                | weak antibacterial activity against <i>S. epidermidis</i> (MIC = 100 µM).                                                                               | [23] |
| 46 | fusariumnol B                                                     |                              |                                             |                                                                                                                                                         |      |
| 47 | fungerin                                                          | <i>Fusarium</i> sp.          | Soil, Qinghai-Tibetan plateau               | antibacterial activity against <i>S. aureus</i> and <i>S. pneumoniae</i> (with IC <sub>50</sub> values of 33.8 and 34.5 µM, respectively)               | [24] |
| 48 | 3-hydroxy-1,2,6,10-tetramethylundecyl hexadecanoate               |                              |                                             |                                                                                                                                                         |      |
| 49 | 3-hydroxy-1,2,6,10-tetramethylundecyl (9 <i>E</i> )-octadecanoate | <i>F. oxysporum</i> YP9B     | the tomato plant root in Pazar-Rize, Turkey | against Gram-positive bacteria ( <i>S. aureus</i> , <i>E. faecalis</i> , <i>S. mutans</i> , <i>B. cereus</i> , and <i>M. smegmatis</i> )                | [25] |
| 50 | 3-hydroxy-1,2,6,10-tetramethylundecyl-octadecanoate               |                              |                                             |                                                                                                                                                         |      |

Table S2. Detail information for *Fusarium*-derived anti-Gram-negative bacterial SMs.

| No. | Name                                                                                                                                                                                                                                                           | Strain                             | Source                                                                                           | Bioactivity                                                                                                                                                                                                             | Ref. |
|-----|----------------------------------------------------------------------------------------------------------------------------------------------------------------------------------------------------------------------------------------------------------------|------------------------------------|--------------------------------------------------------------------------------------------------|-------------------------------------------------------------------------------------------------------------------------------------------------------------------------------------------------------------------------|------|
| 51  | butenolide                                                                                                                                                                                                                                                     | <i>Fusarium</i> sp.                | -                                                                                                | selective inhibitory activity against <i>E. coli</i> .                                                                                                                                                                  | [26] |
| 52  | (3a <i>S</i> ,6 <i>R</i> ,6a <i>R</i> )-3a,6-dihydroxy-6-((2 <i>E</i> ,4 <i>E</i> ,6 <i>E</i> )-7-(4-(1-hydroxyethyl)-2-methyl-2,5-dihydrofuran-2-yl)-2-methylhepta-2,4,6-trienoyl) hexahydro -5 <i>H</i> -furo[3,2- <i>b</i> ] pyrrol-5-one                   |                                    |                                                                                                  | antibacterial efficacies against the soil bacterium <i>Acinetobacter</i> sp., comparable to the reference standard streptomycin; antibacterial activity against the environmental strain of <i>E. coli</i> , 5~10 µg/mL |      |
| 53  | (1 <i>R</i> ,4 <i>S</i> ,5 <i>R</i> )-4-hydroxy-4-(2-hydroxyethyl)-1-((2 <i>E</i> ,4 <i>E</i> ,6 <i>E</i> )-7-(4-(1-hydroxyethyl)-2-methyl-2,5-dihydrofuran-2-yl)-2-methylhepta-2,4,6-trienoyl)-6-oxa-3-azabicyclo[3.1.0]hexan-2-one                           |                                    |                                                                                                  |                                                                                                                                                                                                                         |      |
| 54  | Methyl (2 <i>E</i> ,3 <i>E</i> ,5 <i>E</i> ,7 <i>E</i> ,9 <i>E</i> )-11-((3a <i>S</i> ,6 <i>S</i> ,6a <i>R</i> )-3a,6-dihydroxy-5-oxohexahydro-2 <i>H</i> -furo[3,2- <i>b</i> ] pyrrol-6-yl)-2-ethylidene-11-hydroxy-4,10-dimethylundeca-3,5,7,9-tetraenoate   |                                    |                                                                                                  |                                                                                                                                                                                                                         |      |
| 55  | (1 <i>R</i> ,4 <i>S</i> ,5 <i>R</i> )-4-hydroxy-4-(2-hydroxyethyl)-1-((2 <i>E</i> ,4 <i>E</i> ,6 <i>E</i> ,8 <i>E</i> ,10 <i>E</i> )-10-(hydroxymethyl)-2,8-dimethyldodeca-2,4,6,8,10-pentaenoyl)-6-oxa-3-azabicyclo[3.1.0] hexan-2-one                        | <i>F. solani</i><br>JK10           | the roots of <i>Chlorophora regia</i> (Moraceae), Asakraka forest in the Eastern Region of Ghana |                                                                                                                                                                                                                         | [27] |
| 56  | (1 <i>R</i> ,4 <i>S</i> ,5 <i>R</i> )-4-hydroxy-4-(2-hydroxyethyl)-1-((2 <i>E</i> ,4 <i>Z</i> ,6 <i>E</i> ,8 <i>E</i> ,10 <i>E</i> )-10-(hydroxymethyl)-2,8-dimethyldodeca-2,4,6,8,10-pentaenoyl)-6-oxa-3-azabicyclo[3.1.0] hexan-2-one                        |                                    |                                                                                                  |                                                                                                                                                                                                                         |      |
| 57  | (3a <i>S</i> ,6 <i>R</i> ,6a <i>R</i> )-3a,6-dihydroxy-6-((2 <i>E</i> ,4 <i>E</i> ,6 <i>E</i> )-7-(4-(1-hydroxyethyl)-2,3-dimethyl-5-oxo-2,5-dihydrofuran-2-yl)-2-methylhepta-2,4,6-trienoyl)-6a-methylhexahydro-5 <i>H</i> -furo[3,2- <i>b</i> ] pyrrol-5-one |                                    |                                                                                                  | antibacterial activity against the environmental strain of <i>E. coli</i> , 5~10 µg/mL                                                                                                                                  |      |
| 58  | methyl (2 <i>E</i> ,3 <i>E</i> ,5 <i>E</i> ,7 <i>E</i> ,9 <i>E</i> )-2-ethylidene-11-((3 <i>S</i> ,5 <i>S</i> )-5-(2-hydroxyethyl)-2-oxopyrrolidin-3-yl)-4,10-dimethyl-11-oxoundeca-3,5,7,9-tetraenoate                                                        |                                    |                                                                                                  |                                                                                                                                                                                                                         |      |
| 59  | NG-391                                                                                                                                                                                                                                                         |                                    |                                                                                                  |                                                                                                                                                                                                                         |      |
| 60  | NG-393                                                                                                                                                                                                                                                         |                                    |                                                                                                  |                                                                                                                                                                                                                         |      |
| 61  | karimunones B                                                                                                                                                                                                                                                  |                                    |                                                                                                  |                                                                                                                                                                                                                         |      |
| 62  | 7- <i>O</i> -methylrhodolamprometrin                                                                                                                                                                                                                           | <i>Fusarium</i> sp.<br>KJMT.FP.4.3 | a sponge <i>Xestospongia</i> sp., Indonesia                                                      | weak activity against multidrug resistant <i>Salmonella enterica</i> ser with an MIC value of 125 µg/mL                                                                                                                 | [28] |
| 63  | tricinonoic acid                                                                                                                                                                                                                                               |                                    |                                                                                                  |                                                                                                                                                                                                                         |      |
| 64  | fusapyridons A                                                                                                                                                                                                                                                 | <i>Fusarium</i> sp.<br>YG-45       | <i>Maackia chinensis</i> , China                                                                 | antimicrobial activity against <i>P. aeruginosa</i> (MIC 6.25 µg/mL) and <i>S. aureus</i> (MIC 50 µg/mL)                                                                                                                | [29] |

Table S3. Detail information for *Fusarium*-derived both anti-Gram-positive and anti-Gram-negative bacterial SMs

| No. | Name                                                                                                                                                                                                        | Strain                                             | Source                                           | Bioactivity                                                                                                                                                                                               | Ref. |
|-----|-------------------------------------------------------------------------------------------------------------------------------------------------------------------------------------------------------------|----------------------------------------------------|--------------------------------------------------|-----------------------------------------------------------------------------------------------------------------------------------------------------------------------------------------------------------|------|
| 65  | anhydrojavanicin                                                                                                                                                                                            | <i>F. solani</i> B3H, B3K, and BP15-8 (NRRL 15980) | fibrous roots of citrus trees                    | significant activity against <i>S. aureus</i> at MIC values <4 µg/mL                                                                                                                                      | [11] |
| 66  | methyl ether fusarubin                                                                                                                                                                                      | <i>F. proliferatum</i> AF-04                       | -                                                | selective antibacterial activities against <i>B. megaterium</i> , <i>B. subtilis</i> , <i>C. perfringens</i> , <i>E. coli</i> , MRSA                                                                      | [21] |
| 67  | 5- <i>O</i> -methylsolaniol                                                                                                                                                                                 |                                                    |                                                  |                                                                                                                                                                                                           |      |
| 68  | 5- <i>O</i> -Methyljavanicin                                                                                                                                                                                | <i>F. Solani</i> B3H, B3K, and BP15-8 (NRRL 15980) | fibrous roots of citrus trees                    | significant activity against <i>S. aureus</i> at MIC values <4 µg/mL                                                                                                                                      | [11] |
| 69  | 6-hydroxy-astropaquinone B                                                                                                                                                                                  | <i>F. napiforme</i>                                | the mangrove plant, <i>Rhizophora mucronata</i>  | moderate antibacterial activity against <i>Staphylococcus aureus</i> and <i>Pseudomonas aeruginosa</i>                                                                                                    | [30] |
| 70  | astropaquinone D                                                                                                                                                                                            |                                                    |                                                  |                                                                                                                                                                                                           |      |
| 71  | bostrycoidin (bostricoidin)                                                                                                                                                                                 | <i>F. solani</i>                                   | -                                                | moderate antibiotic activity against Gram-positive bacteria ( <i>S. aureus</i> , <i>S. pyogenes</i> )                                                                                                     | [11] |
|     |                                                                                                                                                                                                             | <i>F. solani</i>                                   | fresh healthy roots of <i>Cassia alata</i> Linn. | exhibited prominent inhibition against the above tested pathogenic bacteria                                                                                                                               | [31] |
|     |                                                                                                                                                                                                             | <i>Fusarium</i> sp.                                | -                                                | antimicrobial activity against <i>Pseudomonas aeruginosa</i>                                                                                                                                              | [32] |
| 72  | fusariumin A                                                                                                                                                                                                | <i>Fusarium</i> sp. YD-2                           | twigs of the <i>Santalum album</i> , China       | significant activities against <i>S. aureus</i> and <i>P. aeruginosa</i> with an MIC value of 6.3 µg/mL                                                                                                   | [33] |
| 73  | asperterpenoid A                                                                                                                                                                                            |                                                    |                                                  | moderate activities against <i>S. enteritidis</i> and <i>M. luteus</i> with MIC values of 6.3 and 25.2 µg/mL, respectively                                                                                |      |
| 74  | fusarielin B                                                                                                                                                                                                | <i>F. tricinctum</i> Salicorn 19                   | The aerial parts of <i>S. bigelovii</i> , China. | a broader spectrum antimicrobial activity against <i>M. smegmati</i> , <i>B. subtilis</i> , <i>M. phlei</i> and <i>E. coli</i> with MIC values 19, 19, 10 and 10 µM, respectively                         | [34] |
| 75  | sambacide                                                                                                                                                                                                   | <i>F. sambucinum</i> B10.2                         | -                                                | significant antibacterial activities against <i>S. aureus</i> and <i>E. coli</i>                                                                                                                          | [35] |
| 76  | (2 <i>S</i> ,2' <i>R</i> ,3 <i>R</i> ,3' <i>E</i> ,4 <i>E</i> ,8 <i>E</i> )-1- <i>O</i> - $\beta$ -D-glucopyranosyl-2-N-(2'-hydroxy-3'-octadecenoyl)-3-hydroxy-9-methyl-4,8- sphingadienine                 | <i>Fusarium</i> sp. IFB-121                        | <i>Quercus variabilis</i>                        | strong antibacterial activities against <i>B. subtilis</i> , <i>E. coli</i> , and <i>P. fluorescens</i> , with MICs of 3.9, 3.9, and 1.9 µg/mL, respectively                                              | [36] |
| 77  | (2 <i>S</i> ,2' <i>R</i> ,3 <i>R</i> ,3' <i>E</i> ,4 <i>E</i> ,8 <i>E</i> ,10 <i>E</i> )-1- <i>O</i> - $\beta$ -D-glucopyranosyl-2-N-(2'-hydroxy-3'-octadecenoyl)-3-hydroxy-9-methyl-4,8,10-sphingatrienine |                                                    |                                                  | strong antibacterial activities against <i>B. subtilis</i> , <i>E. coli</i> , and <i>P. fluorescens</i> , with MICs of 7.8, 3.9, and 7.8 µg/mL, respectively                                              |      |
| 78  | enniatiin J <sub>1</sub>                                                                                                                                                                                    | <i>F. tricinctum</i>                               | -                                                | antimicrobial activity against <i>C. perfringens</i> , <i>E. faecium</i> , <i>E. coli</i> , <i>S. dysenteriae</i> , <i>S. aureus</i> , <i>Y. enterocolitica</i> and lactic acid bacteria except <i>B.</i> | [37] |
| 79  | enniatiin J <sub>3</sub>                                                                                                                                                                                    |                                                    |                                                  |                                                                                                                                                                                                           |      |

|           |               |                             |                                                              |                                                                                                         |      |
|-----------|---------------|-----------------------------|--------------------------------------------------------------|---------------------------------------------------------------------------------------------------------|------|
|           |               |                             |                                                              | <i>adolescentis</i>                                                                                     |      |
| <b>80</b> | halymecin A   | <i>Fusarium</i> sp. FE-71-1 | Marine Algae, Japan                                          | activity against <i>E. faecium</i> , <i>K. pneumoniae</i> and <i>P. vulgaris</i> MIC 10 (µg/mL)         | [38] |
| <b>81</b> | fusaequisin A | <i>F. equiseti</i> SF-3-17  | The medicinal plant, <i>Ageratum conyzoides</i> L., Cameroon | moderate antimicrobial activity against <i>S. aureus</i> NBRC 13276 and <i>P. aeruginosa</i> ATCC 15442 | [39] |

Table S4. Detail information for *Fusarium*-derived antifungal SMs

| No. | Name                          | Strain                               | Source                                                                                       | Bioactivity                                                                                                                                                                                                                                                                                                                                                                                                                                                                                                                                         | Ref. |
|-----|-------------------------------|--------------------------------------|----------------------------------------------------------------------------------------------|-----------------------------------------------------------------------------------------------------------------------------------------------------------------------------------------------------------------------------------------------------------------------------------------------------------------------------------------------------------------------------------------------------------------------------------------------------------------------------------------------------------------------------------------------------|------|
| 82  | fusacandin A                  | <i>F. sambucinum</i> AB              | a polypore fruitbody, U.S.A.                                                                 | antifungal activity against <i>C. albicans</i>                                                                                                                                                                                                                                                                                                                                                                                                                                                                                                      | [40] |
| 83  | fusacandin B                  | 1900A-1314                           |                                                                                              |                                                                                                                                                                                                                                                                                                                                                                                                                                                                                                                                                     |      |
| 84  | saricandin                    | <i>Fusarium</i> sp. AB 2202W-161     | a soil sample, Nepal                                                                         | good activity against <i>C. albicans</i>                                                                                                                                                                                                                                                                                                                                                                                                                                                                                                            | [41] |
| 85  | CR377                         | <i>Fusarium</i> sp. CR377            | the interior of a <i>Selaginella pallescens</i> stem, Costa Rica                             | significant activity against <i>C. albicans</i>                                                                                                                                                                                                                                                                                                                                                                                                                                                                                                     | [42] |
| 86  | zearalenone                   | <i>Fusarium</i> sp. PSU-ES73         | leaves of <i>T. hemprichii</i> seagrass, Thailand                                            | weak activity against <i>C. neoformans</i> with an MIC value of 50.26 $\mu$ M                                                                                                                                                                                                                                                                                                                                                                                                                                                                       | [43] |
| 87  | 5 $\beta$ -hydroxyzearalenone | <i>Fusarium</i> sp. PSU-ES123        | a seagrass, <i>Enhalus acoroides</i> , Thailand                                              | weak antifungal activity against <i>C. neoformans</i> with an MIC value of 128 $\mu$ g/mL                                                                                                                                                                                                                                                                                                                                                                                                                                                           | [44] |
| 88  | neofusapyrone                 | <i>Fusarium</i> sp. FH-146           | driftwood, Japan                                                                             | moderate activity against <i>A. clavatus</i> F318a                                                                                                                                                                                                                                                                                                                                                                                                                                                                                                  | [45] |
| 89  | beauvericin K                 | <i>Fusarium</i> sp.                  | seawater collected from the Bohai Sea, China                                                 | significant activity against the yeast <i>C. albicans</i> with an IC <sub>50</sub> value of 6.25 $\mu$ g/mL                                                                                                                                                                                                                                                                                                                                                                                                                                         | [46] |
| 90  | beauvericin D                 |                                      |                                                                                              |                                                                                                                                                                                                                                                                                                                                                                                                                                                                                                                                                     |      |
| 91  | cyclosporins A, B and C       | <i>Fusarium</i> sp. S-435            | -                                                                                            | activity against filamentous pathogenic and saprophytic fungi                                                                                                                                                                                                                                                                                                                                                                                                                                                                                       | [47] |
| 92  |                               |                                      |                                                                                              |                                                                                                                                                                                                                                                                                                                                                                                                                                                                                                                                                     |      |
| 93  |                               | <i>F. solani</i>                     | soil, Japan                                                                                  | <i>V. ceratosperma</i> and <i>H. oryzae</i>                                                                                                                                                                                                                                                                                                                                                                                                                                                                                                         | [48] |
| 94  | fusaripeptide A               | <i>Fusarium</i> sp.                  | the roots of <i>Mentha longifolia</i> L. (Labiatae), Saudi Arabia                            | potent antifungal activity toward <i>C. albicans</i> , <i>C. glabrata</i> , <i>C. krusei</i> , and <i>A. fumigatus</i> with IC <sub>50</sub> values of 0.11, 0.24, 0.19, and 0.14 $\mu$ M, respectively                                                                                                                                                                                                                                                                                                                                             | [49] |
|     |                               | <i>F. larvarum</i> F-155,597         | -                                                                                            | parnafungin A had in vivo efficacy in a murine model of disseminated candidiasis.                                                                                                                                                                                                                                                                                                                                                                                                                                                                   | [50] |
| 95  | parnafungin A                 | <i>F. larvarum</i> MF7022 and MF7023 | an unidentified lichen thallus, Spain                                                        | broad spectrum activity against the ascomycetous yeasts, <i>C. albicans</i> (MIC 0.014 $\mu$ g/mL), <i>C. krusei</i> (0.014 $\mu$ g/mL), <i>C. glabrata</i> (1.1 $\mu$ g/mL), <i>C. tropicalis</i> (3.3 $\mu$ g/mL), <i>C. lusitaniae</i> (1.1 $\mu$ g/mL), <i>C. parapsilosis</i> (1.1 $\mu$ g/mL) and <i>S. cerevisiae</i> (3.3 $\mu$ g/mL). Under identical assay conditions, the MIC of caspofungin (Cancidas) against <i>C. albicans</i> was 0.01 $\mu$ g/mL. The parnafungins also were active in an agar assay against <i>A. fumigatus</i> . | [51] |
| 96  | parnafungin B                 |                                      |                                                                                              |                                                                                                                                                                                                                                                                                                                                                                                                                                                                                                                                                     |      |
| 97  | parnafungin C                 | <i>F. larvarum</i> F-155,597         | -                                                                                            | less potent against all of the <i>Candida</i> species tested, but in some cases, such as against <i>C. tropicalis</i> and <i>C. lusitaniae</i> , these analogs had comparable antifungal activity                                                                                                                                                                                                                                                                                                                                                   | [50] |
| 98  | parnafungin D                 |                                      |                                                                                              |                                                                                                                                                                                                                                                                                                                                                                                                                                                                                                                                                     |      |
| 99  | fusaricide                    | <i>Fusarium</i> sp.                  | Flowers of sourwood ( <i>Oxydendron arboreum</i> ), Georgia State Botanical Garden in Athens | antifungal activity against <i>Candida albicans</i> and <i>Penicillium chrysogenum</i> (MICs 16 and 8 $\mu$ g/mL, respectively).                                                                                                                                                                                                                                                                                                                                                                                                                    | [52] |
| 100 | indole acetic acid            | <i>F. fujikuroi</i>                  | the aerial parts of <i>Paepalanthus chiquitensis</i> (Eriocaulaceae),                        | moderate antimicrobial activity for all the bacterial strains ( <i>S. aureus</i> , <i>E. coli</i> , <i>S. setubal</i> ) evaluated and activity against the fluconazole-resistant <i>C. albicans</i> .                                                                                                                                                                                                                                                                                                                                               | [53] |



| Brazil |                               |                              |                                                       |                                                                                                                                                                                                                                                                                                                                                          |
|--------|-------------------------------|------------------------------|-------------------------------------------------------|----------------------------------------------------------------------------------------------------------------------------------------------------------------------------------------------------------------------------------------------------------------------------------------------------------------------------------------------------------|
| 101    | fusaribenzamide A             | <i>Fusarium</i> sp.          | the internal tissue of <i>Mentha longifolia</i> roots | possessed a significant antifungal activity towards <i>C. albicans</i> with MIC 11.9 µg/disc compared to nystatin (MIC 4.9 µg/disc). However, it showed moderate activity toward <i>S. aureus</i> and <i>E. coli</i> with MIC values 62.8 and 56.4 µg/disc, respectively in comparison to ciprofloxacin (MICs 12.5 and 10.4 µg/disc, respectively). [54] |
| 102    | sambutoxin                    | <i>Fusarium</i> sp. FK1-7550 | Soil, Japan                                           | significant activities against multidrug-sensitive <i>S. cerevisiae</i> 12geneΔ0HSR-iERG6 with an MIC value of 0.064 µg/mL                                                                                                                                                                                                                               |
| 103    | N-demethylsambutoxin          |                              |                                                       | significant activities against multidrug-sensitive <i>S. cerevisiae</i> 12geneΔ0HSR-iERG6 with an MIC value of 0.32 µg/mL [55]                                                                                                                                                                                                                           |
| 104    | 6-deoxyoxysporidinone         |                              |                                                       | significant activities against multidrug-sensitive <i>S. cerevisiae</i> 12geneΔ0HSR-iERG6 with an MIC value of 2.0 µg/mL                                                                                                                                                                                                                                 |
| 105    | oxysporidinone                | <i>F. oxysporum</i> N17B     | a grassy area in Lakselv, Norway                      | selective potent activity against <i>C. albicans</i>                                                                                                                                                                                                                                                                                                     |
| 106    | 6- <i>epi</i> -oxysporidinone |                              |                                                       | selective fungistatic activity against <i>A. fumigatus</i> [56]                                                                                                                                                                                                                                                                                          |
| 107    | wortmannin                    |                              |                                                       |                                                                                                                                                                                                                                                                                                                                                          |
| 108    | culmorin                      | <i>Fusarium</i> sp.          | -                                                     | both marine ( <i>S. marina</i> , <i>M. pelagica</i> ) and medically relevant fungi ( <i>A. fumigatus</i> , <i>A. niger</i> , <i>C. albicans</i> , <i>Rhizopus species</i> , <i>T. mentagrophytes</i> ) as being in the 1 µM range [57,58]                                                                                                                |

Table S5. Detail information for *Fusarium*-derived both antibacterial and antifungal SMs.

| No. | Name                                                                                                                                                                           | Strain                                             | Source                                                        | Bioactivity                                                                                                                                                                                                    | Ref.    |
|-----|--------------------------------------------------------------------------------------------------------------------------------------------------------------------------------|----------------------------------------------------|---------------------------------------------------------------|----------------------------------------------------------------------------------------------------------------------------------------------------------------------------------------------------------------|---------|
| 109 | javanicin                                                                                                                                                                      | <i>Fusarium</i> sp. BCC14842                       | Bamboo leaf, Thailand                                         | antifungal ( <i>C. albicans</i> ) activity with IC <sub>50</sub> of 6.16 µg/mL; anti-TB ( <i>M. tuberculosis</i> ) with MIC of 25 µg/mL                                                                        | [13]    |
|     |                                                                                                                                                                                | <i>F. solani</i> A2                                | plant ' <i>Glycyrrhiza glabra</i> ', India                    | against <i>B. cereus</i> and <i>S. pyogenes</i> with MIC of <1 µg/mL as compared to ciprofloxacin whose MIC against these strains is 0.15 and 10 µg/mL, respectively                                           | [14]    |
|     |                                                                                                                                                                                | <i>F. javanicum</i>                                | -                                                             | -                                                                                                                                                                                                              | [59]    |
| 110 | fusarubin                                                                                                                                                                      | <i>F. solani</i> B3H, B3K, and BP15-8 (NRRL 15980) | fibrous roots of citrus trees                                 | significant activity against <i>S. aureus</i> at MIC values <4 µg/mL                                                                                                                                           | [11]    |
| 111 | dihydrofusarubin                                                                                                                                                               |                                                    |                                                               |                                                                                                                                                                                                                |         |
| 112 | 5,10-dihydroxy-3,7-dimethoxy-3-methyl-3,4-dihydro-1 <i>H</i> -benzo[ <i>g</i> ]isochromene-6,9-dione                                                                           | <i>F. martii</i>                                   | -                                                             | moderate antibiotic activity against Gram-positive bacteria and fungi. ( <i>C. albicans</i> , <i>S. cerevisiae</i> , <i>S. pneumoniae</i> , <i>S. pyogenes</i> , <i>Bacillus subtilis</i> , <i>S. aureus</i> ) | [60]    |
| 113 | 3-ethoxy-5,10-dihydroxy-7-methoxy-3-methyl-3,4-dihydro-1 <i>H</i> -benzo[ <i>g</i> ]isochromene-6,9-dione                                                                      |                                                    |                                                               |                                                                                                                                                                                                                |         |
| 114 | (3 <i>S</i> ,4 <i>aR</i> ,10 <i>aS</i> )-6,9-dihydroxy-3,7-dimethoxy-3-methyl-3,4,4 <i>a</i> ,10 <i>a</i> -tetrahydro-1 <i>H</i> -benzo[ <i>g</i> ]isochromene-5,10-dione      |                                                    |                                                               |                                                                                                                                                                                                                |         |
| 115 | (3 <i>S</i> ,4 <i>aR</i> ,10 <i>aS</i> )-3-ethoxy-6,9-dihydroxy-7-methoxy-3-methyl-3,4,4 <i>a</i> ,10 <i>a</i> -tetrahydro-1 <i>H</i> -benzo[ <i>g</i> ]isochromene-5,10-dione |                                                    |                                                               |                                                                                                                                                                                                                |         |
| 116 | bikaverin                                                                                                                                                                      | <i>Fusarium</i> sp. HKF15                          | Soil, India                                                   | bikaverin inhibits <i>E. coli</i> growth significantly in the growth curve study in a microtiter plate reader                                                                                                  | [61]    |
|     |                                                                                                                                                                                | <i>Fusarium</i> sp.                                | -                                                             | partially inhibited the growth on agar of <i>Penicillium notatum</i> , <i>Alternaria humicola</i> , and <i>Aspergillus flavus</i>                                                                              | [46,62] |
| 117 | lateropyrone                                                                                                                                                                   | <i>Fusarium</i> sp. BZCB-CA                        | <i>Bothriospermum chinense</i> , China                        | significant inhibitory activity against MRSA and vancomycin-resistant of <i>E. faecalis</i> and <i>E. faecium</i> , with MIC values of 3.1, 12.5 and 25 µM, respectively                                       | [63]    |
|     |                                                                                                                                                                                | <i>F. tricinctum</i>                               | healthy rhizomes of <i>Aristolochia paucinervis</i> , Morocco | good antibacterial activity against <i>B. subtilis</i> , <i>S. aureus</i> , <i>S. pneumoniae</i> , and <i>E. faecalis</i> , with MIC values ranging from 2 to 8 µg/mL                                          | [64]    |
|     |                                                                                                                                                                                | <i>F. lateritium</i> Nees                          | <i>Tsuga heterophylla</i> (Raf.) Sarg. Trees, Canada          | significant inhibitory activity towards the growth of the gram-positive bacterium <i>S. aureus</i> and the yeast <i>C. albicans</i> , but did not affect the                                                   | [65]    |

|     |                            |                                  |                                                                   |                                                                                                                                                                                                                                       |      |
|-----|----------------------------|----------------------------------|-------------------------------------------------------------------|---------------------------------------------------------------------------------------------------------------------------------------------------------------------------------------------------------------------------------------|------|
|     |                            |                                  |                                                                   | gram-negative bacterium <i>E. coli</i>                                                                                                                                                                                                |      |
|     |                            | <i>F. acuminatum</i> TC2-084     | The medicinal plant <i>Geum macrophyllum</i> , Canada             | good activity against <i>M. tuberculosis</i> H37Ra ATCC 25177, <i>S. aureus</i> ATCC 29213, MRSA, <i>E. faecium</i> ATCC 35667, VRE, <i>C. albicans</i> ATCC 14053                                                                    | [66] |
| 118 | BE-29602                   | <i>Fusarium</i> sp. AB 2202W-161 | a soil sample, Nepal                                              | good activity against <i>C. albicans</i>                                                                                                                                                                                              | [41] |
|     |                            | <i>Fusarium</i> sp. F29602       | a soil sample, Japan                                              | good activity against <i>C. albicans</i> , <i>S. cerevisiae</i> , <i>S. pombe</i> , <i>P. chrysogenum</i> , <i>B. subtilis</i> , <i>B. cereus</i> , <i>M. luteus</i>                                                                  | [67] |
| 119 | fusarielin A               | <i>Fusarium</i> sp. K432         | soil                                                              | moderate antifungal activities against <i>P. fumigatus</i> , <i>A. kikuchiana</i> , <i>C. lindemuthianum</i> , <i>F. nivale</i> , <i>E. oryzae</i> , <i>P. oryzae</i>                                                                 | [68] |
|     |                            | <i>F. tricinatum</i>             | the edible marine brown alga <i>Sargassum ringgoldium</i> , Korea | activities against <i>S. aureus</i> , MRSA and MDRSA                                                                                                                                                                                  | [9]  |
| 120 | helvolic acid methyl ester |                                  |                                                                   |                                                                                                                                                                                                                                       |      |
| 121 | helvolic acid              | <i>Fusarium</i> sp. JX119038     | <i>Ficus carica</i> , China                                       | potent antifungal and antibacterial activities ( <i>B. subtilis</i> , <i>S. aureus</i> , <i>E. coli</i> , <i>B. cinerea</i> , <i>F. Graminearum</i> and <i>P. capsica</i> )                                                           | [69] |
| 122 | hydrohelvolic acid         |                                  |                                                                   |                                                                                                                                                                                                                                       |      |
| 123 | fusartricin                | <i>F. tricinatum</i> Salicorn 19 | The aerial parts of <i>S. bigelovii</i> , China.                  | significant antimicrobial activities against <i>E. aerogenes</i> , <i>M. tetragenus</i> and <i>C. albicans</i> with the MIC values 19, 19 and 19 $\mu$ M, respectively                                                                | [34] |
| 124 | gibepyrone A               |                                  |                                                                   |                                                                                                                                                                                                                                       |      |
| 125 | gibepyrone B               | <i>F. fujikuroi</i>              | -                                                                 | antimicrobial activity against Gram-positive bacteria ( <i>Bacillus subtilis</i> , <i>Staphylococcus aureus</i> ) and yeasts ( <i>Saccharomyces cerevisiae</i> , <i>Candida albicans</i> )                                            | [70] |
| 126 | fusolanone B               | <i>F. solani</i> HDN15-410       | the root of <i>Rhizophora apiculata</i> Blume, China              | activity with MIC value 6.25 $\mu$ g/mL on <i>V. parahaemolyticus</i> . antimicrobial activity against <i>M. albican</i> , <i>P. aeruginosa</i> , <i>B. subtilis</i> and <i>V. parahaemolyticus</i>                                   | [71] |
|     |                            | <i>Fusarium</i> sp. FH-146       | driftwood, Japan                                                  | weak activity against <i>A. clavatus</i> F318a and <i>P. aeruginosa</i> ATCC 15442 with MICs of 25 $\mu$ g/mL and 50 $\mu$ g/mL, respectively                                                                                         | [45] |
| 127 | fusapyrone                 | <i>F. semitectum</i>             | infected maize stalk tissues collected in southern Italy          | Fusapyrone inhibits <i>G. Candidum</i>                                                                                                                                                                                                | [72] |
|     |                            | <i>F. semitectum</i> ITEM-393    | -                                                                 | antifungal activity against filamentous fungi and difficult-to-treat human pathogenic fungi such as <i>Aspergillus</i> spp.; <i>C. kefyr</i> , an emergent opportunistic pathogen, showed a remarkable sensitivity only to fusapyrone | [73] |
|     |                            | <i>Fusarium</i> sp. FH-146       | driftwood, Japan                                                  | moderate activity against <i>A. clavatus</i> F318a, <i>P. aeruginosa</i> ATCC 15442                                                                                                                                                   | [45] |
| 128 | deoxyfusapyrone            | <i>F. semitectum</i>             | infected maize stalk tissues collected in southern Italy          | deoxyfusapyrone inhibits <i>G. Candidum</i>                                                                                                                                                                                           | [72] |
|     |                            | <i>F. semitectum</i> ITEM-393    | -                                                                 | antifungal activity against filamentous fungi and difficult-to-treat human pathogenic fungi such as <i>Aspergillus</i> spp.                                                                                                           | [73] |

|     |                   |                                                              |                                                                              |                                                                                                                                                                                                                                                                                                                                                                           |      |
|-----|-------------------|--------------------------------------------------------------|------------------------------------------------------------------------------|---------------------------------------------------------------------------------------------------------------------------------------------------------------------------------------------------------------------------------------------------------------------------------------------------------------------------------------------------------------------------|------|
| 129 | fusaric acid      | <i>Fusarium</i> sp. TP-G1                                    | the Root of <i>Dendrobium officinale</i> Kimura et Migo                      | antibacterial activity against <i>A. baumannii</i> , with an MIC of 64 µg /mL                                                                                                                                                                                                                                                                                             | [5]  |
|     |                   | <i>F. oxysporum</i> EF119                                    | a healthy root of red pepper ( <i>Capsicum annuum</i> L.), Korean            | fusaric acid effectively suppressed the mycelial growth of two oomycetes, such as <i>P. capsici</i> and <i>P. infestans</i> with IC <sub>50</sub> values less than 1 µg/mL. Fusaric acid suppressed completely the growth of all bacteria tested at concentrations less than 100 µg/mL. The IC <sub>50</sub> values ranged from 0.2 to 12 µg/mL.                          | [74] |
|     |                   | <i>F. fujikuroi</i>                                          | the Aerial parts of <i>Paepalanthus chiquitensis</i> (Eriocaulaceae), Brazil | moderate antimicrobial activity for all the bacterial strains evaluated.                                                                                                                                                                                                                                                                                                  | [53] |
|     |                   | <i>F. verticillioides</i> RRC 408 and MRC 826                | -                                                                            | inhibitory to the growth of most <i>Bacillus</i> species                                                                                                                                                                                                                                                                                                                  | [75] |
|     |                   | <i>F. oxysporum</i> PR-33                                    | Torres-Rio Grande do Sul, Brazil                                             | inhibit the growth of most <i>Bacillus</i> species                                                                                                                                                                                                                                                                                                                        | [76] |
| 130 | equisetin         | <i>F. equiseti</i> NRRL 5537                                 | -                                                                            | against several strains of Gram-positive bacteria <i>B. subtilis</i> , <i>M. phlei</i> and <i>S. aureus</i> and the Gram-negative bacteria <i>N. perflava</i> , at concentrations of 0.5–4.0 µg/mL of growth substrate                                                                                                                                                    | [77] |
|     |                   | Coculture of <i>S. erythraea</i> with <i>F. pallidroseum</i> | -                                                                            | minimum inhibitory concentrations were <1.25 µg against <i>S. aureus</i> and 2.5 µg against <i>S. erythraea</i> .                                                                                                                                                                                                                                                         | [78] |
|     |                   | <i>Fusarium</i> sp.                                          | <i>Opuntia dillenii</i>                                                      | antibacterial activities against the Gram-positive bacteria <i>B. subtilis</i> , <i>S. aureus</i> and MRSA with MICs of 8–16 µg/ mL                                                                                                                                                                                                                                       | [79] |
|     |                   | <i>F. equiseti</i> AGR12                                     | the stem of <i>Rhizophora stylosa</i> Griff                                  | remarkable antimicrobial activities against <i>B. subtilis</i> and <i>S. aureus</i> , with MIC value of 32 µg/mL                                                                                                                                                                                                                                                          | [16] |
|     |                   | <i>F. equiseti</i> SCSIO 41019                               | Sponge ( <i>Calyspongia</i> sp.), China                                      | strongest antibacterial activities against <i>S. aureus</i> and MRSA with MIC values of 2.0 and 3.9 µg/mL, respectively                                                                                                                                                                                                                                                   | [15] |
| 131 | fusarithioamide A | <i>F. chlamydosporium</i>                                    | the inner tissue of <i>A. garcinii</i> leaves                                | antibacterial potential towards <i>B. cereus</i> , <i>S. aureus</i> , and <i>E. coli</i> with inhibition zone diameters (IZDs) of 19.0, 14.1, and 22.7 mm, respectively and MICs values of 3.1, 4.4, and 6.9 µg/mL, respectively; the most potent antifungal activity towards <i>C. albicans</i> (IZD 16.2 mm) comparable to clotrimazole (IZD 18.5 mm, positive control) | [80] |
| 132 | fusarithioamide B | <i>F. chlamydosporium</i>                                    | <i>Anvillea garcinii</i> (Burm.f.) DC. (Asteraceae), Egypt                   | selective antifungal activity towards <i>C. albicans</i> (MIC 1.9 µg/mL and IZD 14.5 mm), comparing to clotrimazole (MIC 2.8 µg/mL and IZD 17.9 mm); possessed high antibacterial potential towards <i>E. coli</i> , <i>B. cereus</i> , and <i>S. aureus</i> compared to ciprofloxacin.                                                                                   | [81] |
| 133 | beauvericin       | <i>F. redolens</i> Dzf2                                      | rhizomes of <i>Dioscorea zingiberensis</i>                                   | strong activity in vitro against <i>E. coli</i> , <i>A. tumefaciens</i> , <i>P. lachrymans</i> , <i>X. vesicatoria</i> , <i>B. subtilis</i> and <i>S. haemolyticus</i>                                                                                                                                                                                                    | [82] |
|     |                   | <i>F. proliferatum</i> CECT 20569                            | CECT Valencia, Spain                                                         | activity against <i>C. perfringens</i> CECT 4647, <i>S. enterica</i>                                                                                                                                                                                                                                                                                                      | [83] |
|     |                   | <i>F. oxysporum</i>                                          | the bark of <i>C. kanehirae</i> ,                                            | anti-bacterial activity towards MRSA and <i>B. subtilis</i> (MIC= 3.125                                                                                                                                                                                                                                                                                                   | [17] |

|     |                                                                               |                                  |                                                                            |                                                                                                                                                                                                                                                                                                                                     |      |
|-----|-------------------------------------------------------------------------------|----------------------------------|----------------------------------------------------------------------------|-------------------------------------------------------------------------------------------------------------------------------------------------------------------------------------------------------------------------------------------------------------------------------------------------------------------------------------|------|
|     |                                                                               |                                  | Taiwan Province                                                            | µg/mL).                                                                                                                                                                                                                                                                                                                             |      |
|     |                                                                               | <i>Fusarium</i> sp. TP-G1        | the Root of <i>Dendrobium officinale</i> Kimura et Migo                    | good antibacterial activities against <i>S. aureus</i> and MRSA with MIC value of 4.0 µg/mL                                                                                                                                                                                                                                         | [5]  |
| 134 |                                                                               | <i>Fusarium</i> sp. MOBCOF-1     | The surface of the alga <i>Codium fragile</i> , the east coast of Scotland | activity against <i>S. aureus</i> and vancomycin resistant <i>enterococci</i> VRE788                                                                                                                                                                                                                                                | [84] |
|     |                                                                               | <i>F. tricinctum</i>             | healthy rhizomes of <i>Aristolochia paucineris</i> , Morocco               | antibacterial activity against <i>B. subtilis</i> , <i>S. aureus</i> , <i>S. pneumoniae</i> , and <i>E. faecalis</i> with MIC values in the range 2–8 µg/mL                                                                                                                                                                         | [64] |
| 135 | enniatiin A, A1, B and B1                                                     | <i>F. tricinctum</i> CECT 20150  | Spain                                                                      | antibacterial activity against <i>C. perfringens</i> and <i>S. aureus</i> CECT 976                                                                                                                                                                                                                                                  | [85] |
|     |                                                                               | <i>F. oxysporum</i> (N17B)       | a grassy area in Lakselv, Norway                                           | moderate activity against <i>C. albicans</i> , <i>C. neoformans</i> , and <i>M. intracellulare</i>                                                                                                                                                                                                                                  | [56] |
| 136 |                                                                               | <i>F. dimerum</i>                | the plant tissue of <i>Magnolia x soulangeana</i> Soul. - Bod., Slovakia   | effective against <i>B. subtilis</i> CCM 1999, <i>C. albicans</i> CCY 29391, <i>T. cutaneum</i> CCY 30510 and <i>C. neoformans</i> CCY 1716                                                                                                                                                                                         | [86] |
| 137 |                                                                               | <i>F. tricinctum</i> Salicorn 19 | The aerial parts of <i>S. bigelovii</i> , China                            | powerful antimicrobial activities toward <i>B. subtilis</i> , <i>E. aerogenes</i> and <i>M. tetragenus</i> with MIC values 13, 13 and 6 µM                                                                                                                                                                                          | [34] |
|     |                                                                               | <i>F. lateritium</i> Nees        | -                                                                          | strong antifungal activity against <i>E. armenica</i>                                                                                                                                                                                                                                                                               | [87] |
| 138 | fusaramin                                                                     | <i>Fusarium</i> sp. FKI-7550     | soil, Japan                                                                | growth inhibition against some Gram-positive bacteria ( <i>S. aureus</i> , <i>B. subtilis</i> and <i>K. rhizophila</i> ), one Gram-negative bacterium ( <i>X. oryzae</i> pv. <i>oryzae</i> ) and multidrug-sensitive <i>S. cerevisiae</i> 12geneΔ0HSR-iERG6                                                                         | [55] |
| 139 | 2-oxo-8-azatricyclo [9.3.1.13,7]-hexadeca-1(15),3(16),4,6,11,13-hexaen-10-one |                                  |                                                                            | a significant antimicrobial effect at concentrations of 0.8-6.3 µg/mL against bacterial and fungi.                                                                                                                                                                                                                                  |      |
| 140 | (1-benzyl-2-methoxy-2-oxoethyl)-2-hydroxy-3-methylbutanoate                   | <i>F. oxysporum</i> YP9B         | the tomato plant root in Pazar-Rize, Turkey                                | a strong antimicrobial effect at concentrations of 0.47-1.8 µg/mL against Gram-positive bacteria ( <i>S. aureus</i> , <i>E. faecalis</i> , <i>S. mutans</i> , <i>B. cereus</i> , and <i>M. smegmatis</i> ) and a moderate antimicrobial effect against Gram-negative bacteria and fungi at concentrations of 60 µg/mL               | [25] |
| 141 | 2,3-dihydroxypropanoic (11Z)-octadecenoic anhydride                           |                                  |                                                                            | a moderate antimicrobial effect at concentrations of 3.8-30.6 µg/mL against bacterial and fungi                                                                                                                                                                                                                                     |      |
| 142 | 2,3-dihydroxypropanoic, (9E,12E)-octadecadienoic anhydride                    |                                  |                                                                            |                                                                                                                                                                                                                                                                                                                                     |      |
| 143 | chrysophanol                                                                  |                                  |                                                                            |                                                                                                                                                                                                                                                                                                                                     |      |
| 144 | ω-hydroxyemodin                                                               |                                  |                                                                            | antibacterial and antifungal activity.                                                                                                                                                                                                                                                                                              |      |
| 145 | 17-Demethyl-2,11-dideoxy-rhizoxin                                             | <i>F. equiseti</i>               | the brown alga <i>Padina pavonica</i> , the Red Sea                        | w-hydroxyemodin and cordycepin were potent against <i>B. subtilis</i> , <i>S. aureus</i> and <i>C. albicans</i> . Cyclo (L-Pro-L-Val) was the most potent against <i>B. megaterium</i> while, 17-demethyl-2,11- dideoxy-rhizoxin was more active against <i>C. albicans</i> . chrysophanol was more active against <i>S. aureus</i> | [88] |
| 146 | perlolyrine                                                                   |                                  |                                                                            |                                                                                                                                                                                                                                                                                                                                     |      |
| 147 | cordycepin                                                                    |                                  |                                                                            |                                                                                                                                                                                                                                                                                                                                     |      |
| 148 | cyclo-(L-Ala-L-Leu)                                                           |                                  |                                                                            |                                                                                                                                                                                                                                                                                                                                     |      |
| 149 | cyclo(L-Pro-L-Val)                                                            |                                  |                                                                            |                                                                                                                                                                                                                                                                                                                                     |      |

Table S6. Detail information for *Fusarium*-derived antiviral SMs.

| No. | Name                                                        | Strain                                                                   | Source                                                                                       | Bioactivity                                                                                                                                                                                                                                                                                                        | Ref. |
|-----|-------------------------------------------------------------|--------------------------------------------------------------------------|----------------------------------------------------------------------------------------------|--------------------------------------------------------------------------------------------------------------------------------------------------------------------------------------------------------------------------------------------------------------------------------------------------------------------|------|
| 64  | fusapyridon A                                               | <i>Fusarium</i> sp. CPCC 400857                                          | the stem of tea plant                                                                        | antiviral activity against the coronavirus (HCoV-OC43) with IC <sub>50</sub> values of 13.33 and 6.65 $\mu$ M, respectively                                                                                                                                                                                        | [89] |
| 99  | fusaricide                                                  | <i>Fusarium</i> sp.                                                      | Flowers of sourwood ( <i>Oxydendron arboreum</i> ), Georgia State Botanical Garden in Athens | anti-HIV                                                                                                                                                                                                                                                                                                           | [52] |
| 105 | oxysporidinone                                              | <i>Fusarium</i> sp. CPCC 400857                                          | the stem of tea plant                                                                        | antiviral activity against the coronavirus (HCoV-OC43) with IC <sub>50</sub> values of 13.33 and 6.65 $\mu$ M, respectively                                                                                                                                                                                        | [89] |
| 135 | enniatiin A1                                                | <i>Fusarium</i> sp.                                                      | -                                                                                            | The compounds protected human lymphoblastoid cells from HIV-1 induced cell killing with an in vitro “therapeutic index” of approximately 200 (IC <sub>50</sub> = 1.9 $\mu$ g ml <sup>-1</sup> , EC <sub>50</sub> = 0.01 $\mu$ g ml <sup>-1</sup> )                                                                 | [90] |
| 136 | enniatiin B                                                 |                                                                          |                                                                                              |                                                                                                                                                                                                                                                                                                                    |      |
| 137 | enniatiin B1                                                |                                                                          |                                                                                              |                                                                                                                                                                                                                                                                                                                    |      |
| 140 | (1-benzyl-2-methoxy-2-oxoethyl)-2-hydroxy-3-methylbutanoate | <i>F. oxysporum</i> YP9B                                                 | the tomato plant root in Pazar-Rize, Turkey                                                  | antiviral activity against HSV type-1 was determined to be 0.312 $\mu$ M                                                                                                                                                                                                                                           | [25] |
| 141 | 2,3-dihydroxypropanoic (11Z)- octadecenoic anhydride        | <i>F. oxysporum</i> YP9B                                                 | the tomato plant root in Pazar-Rize, Turkey                                                  | antiviral activity against HSV type-1 was determined to be 1.25 $\mu$ M                                                                                                                                                                                                                                            | [25] |
| 142 | 2,3-dihydroxypropanoic, (9E,12E)- octadecadienoic anhydride |                                                                          |                                                                                              |                                                                                                                                                                                                                                                                                                                    |      |
| 144 | $\omega$ -hydroxyemodin                                     | <i>F. equiseti</i>                                                       | the brown alga <i>Padina Pavonica</i> , the Red Sea                                          | Cordycepin showed less potency, 17-demethyl-2,11-dideoxy-rhizoxin and perlolyrine were moderately potent. Cyclo ( <i>L</i> -Pro- <i>L</i> -Val) showed good potency against HCV NS3/4A protease while, $\omega$ -hydroxyemodin was the most potent HCVPR inhibitors                                                | [88] |
| 145 | 17-Demethyl-2,11-dideoxy-rhizoxin                           |                                                                          |                                                                                              |                                                                                                                                                                                                                                                                                                                    |      |
| 146 | perlolyrine                                                 |                                                                          |                                                                                              |                                                                                                                                                                                                                                                                                                                    |      |
| 147 | cordycepin                                                  |                                                                          |                                                                                              |                                                                                                                                                                                                                                                                                                                    |      |
| 149 | cyclo( <i>L</i> -Pro- <i>L</i> -Val)                        |                                                                          |                                                                                              |                                                                                                                                                                                                                                                                                                                    |      |
| 150 | fusaindoterpene B                                           | <i>Fusarium</i> sp. L1                                                   | the inner tissue of the sea star <i>Acanthaster planci</i> , China                           | inhibitory activity against the Zika virus (ZIKV) in a standard plaque assay with EC <sub>50</sub> values of 7.5, 4.2, and 5.0 $\mu$ M, respectively.                                                                                                                                                              | [91] |
| 151 | JBIR-03                                                     |                                                                          |                                                                                              |                                                                                                                                                                                                                                                                                                                    |      |
| 152 | 1,2-bis(1 <i>H</i> -indol-3-yl) ethane-1,2-dione            |                                                                          |                                                                                              |                                                                                                                                                                                                                                                                                                                    |      |
| 153 | ara-A                                                       |                                                                          |                                                                                              |                                                                                                                                                                                                                                                                                                                    |      |
| 154 | cyclic tetrapeptidocyclo-[Phenylalanyl-proleu-pro]          | <i>F. equiseti</i>                                                       | the brown alga <i>Padina Pavonica</i> , the Red Sea                                          | ara-A showed less potency, cyclic tetrapeptidocyclo-[Phenylalanyl-proleu-pro], 5-chloro-3,6-dihydroxy-2-methyl-1,4-benzoquinone and were moderately potent; griseoxanthone C showed good potency against HCV NS3/4A protease while, and cyclo ( <i>L</i> -Tyr- <i>L</i> -Pro) was the most potent HCVPR inhibitors | [88] |
| 155 | cyclo ( <i>L</i> -Tyr- <i>L</i> -Pro)                       |                                                                          |                                                                                              |                                                                                                                                                                                                                                                                                                                    |      |
| 156 | 5-chloro-3,6-dihydroxy-2-methyl-1,4-benzoquinone            |                                                                          |                                                                                              |                                                                                                                                                                                                                                                                                                                    |      |
| 157 | griseoxanthone C                                            |                                                                          |                                                                                              |                                                                                                                                                                                                                                                                                                                    |      |
| 158 | coculnol                                                    | coculture of <i>F. solani</i> FKI-6853 and <i>Talaromyces</i> sp. FKA-65 | soil, Japan                                                                                  | an inhibitory effect (with IC <sub>50</sub> value of 283 $\mu$ g ml <sup>-1</sup> ) against A/PR/8/34 (H1N1)                                                                                                                                                                                                       | [92] |

Table S7. Detail information for *Fusarium*-derived antiparasitic SMs.

| No. | Name                       | Strain                       | Source                                                            | Bioactivity                                                                                                                                                                                                  | Ref.     |
|-----|----------------------------|------------------------------|-------------------------------------------------------------------|--------------------------------------------------------------------------------------------------------------------------------------------------------------------------------------------------------------|----------|
| 23  | anhydrofusarubin           | <i>Fusarium</i> sp. PSU-F135 | marine brown alga <i>Colpomenia sinuosa</i>                       | weak antimalarial ( <i>P. falciparum</i> K1) activity, with IC <sub>50</sub> values in the range 9.8-14 μM.                                                                                                  | [12]     |
| 28  | 9α-hydroxyhalorosellinia A | <i>Fusarium</i> sp. PSU-F14  | a gorgonian sea fan                                               |                                                                                                                                                                                                              |          |
| 29  | nigrosporin B              |                              |                                                                   |                                                                                                                                                                                                              |          |
| 59  | NG-391                     | <i>Fusarium</i> sp. RK97-94  | -                                                                 | antimalarial activity (IC <sub>50</sub> = 1.8 μM) ( <i>P. falciparum</i> 3D7)                                                                                                                                | [93]     |
| 104 | fusaripeptide A            | <i>Fusarium</i> sp.          | the roots of <i>Mentha longifolia</i> L. (Labiatae), Saudi Arabia | significant antiplasmodial activity toward <i>P. falciparum</i> (D6 clone) with an IC <sub>50</sub> value of 0.34 μM                                                                                         | [49]     |
| 109 | javanicin                  | <i>Fusarium</i> sp. PSU-F135 | marine brown alga <i>Colpomenia sinuosa</i>                       | weak antimalarial ( <i>P. falciparum</i> K1) activity, with IC <sub>50</sub> values in the range 9.8-14 μM.                                                                                                  | [12]     |
| 117 | bikaverin                  | <i>F. fujikuroi</i>          | -                                                                 | specifically effective against <i>Leishmania brasiliensis</i>                                                                                                                                                | [94]     |
| 133 | beauvericin                | <i>Fusarium</i> sp. WC9      | <i>Caesalpinia echinata</i> Lam. (Brazilwood), Brazil             | inhibit <i>T. cruzi</i> with IC <sub>50</sub> 2.43 μM                                                                                                                                                        | [95]     |
|     |                            | <i>F. oxysporum</i> SS46     | medicinal plant <i>Smallanthus sonchifolius</i> (Poepp.) H. Rob.  | promising activity against <i>Leishmania braziliensis</i>                                                                                                                                                    | [96]     |
| 134 | enniatin A                 | <i>F. tricinctum</i> Corda   | the fruits of <i>Hordeum sativum</i> Jess                         | mild antileishmanial activities (displayed inhibition of the activity of thioredoxin reductase enzyme of <i>Plasmodium falciparum</i> )                                                                      | [3]      |
| 135 | enniatin A1                |                              |                                                                   |                                                                                                                                                                                                              |          |
| 136 | enniatin B                 |                              |                                                                   |                                                                                                                                                                                                              |          |
| 137 | enniatin B1                |                              |                                                                   |                                                                                                                                                                                                              |          |
| 159 | bostrycin                  | <i>Fusarium</i> sp. PSU-F14  | a gorgonian sea fan                                               | weak antimalarial ( <i>P. falciparum</i> K1) activity, with IC <sub>50</sub> values in the range 9.8-14 μM.                                                                                                  | [12]     |
| 160 | solaninaphthoquinone       | <i>F. solani</i> PSURSPG227  | Soil, Thailand                                                    | weak antimalarial ( <i>P. falciparum</i> K1) activity (IC <sub>50</sub> of 26.1 μM)                                                                                                                          | [97]     |
| 161 | integracides F             | <i>Fusarium</i> sp.          | the roots of <i>Mentha longifolia</i> L., Saudi Arabia            | significant anti-leishmanial activity towards <i>Leishmania donovani</i> with IC <sub>50</sub> values of 3.74 and 2.53 μg/mL, respectively and IC <sub>90</sub> values of 5.11 and 8.89 μg/mL, respectively. | [98]     |
| 162 | integracides G             |                              |                                                                   | Significant anti-leishmanial activity towards <i>Leishmania donovani</i> with IC <sub>50</sub> values of 4.75 and 3.29 μM, respectively compared to pentamidine (IC <sub>50</sub> 6.35 μM).                  |          |
| 163 | integracides H             |                              |                                                                   |                                                                                                                                                                                                              |          |
| 164 | integracides J             |                              |                                                                   |                                                                                                                                                                                                              |          |
| 165 | dihydroNG391               | <i>Fusarium</i> sp. RK97-94  | -                                                                 | antimalarial activity (IC <sub>50</sub> = 62.1 μM) ( <i>P. falciparum</i> 3D7)                                                                                                                               | [93,100] |
| 166 | dihydrolucilactaene        |                              |                                                                   | potent antimalarial activity (IC <sub>50</sub> = 0.0015 μM) ( <i>P. falciparum</i> 3D7 and K1)                                                                                                               |          |
| 167 | lucilactaene               |                              |                                                                   | potent antimalarial activity (IC <sub>50</sub> = 0.15 μM) ( <i>P. falciparum</i> 3D7)                                                                                                                        |          |
| 168 | 13α-hydroxylucilactaene    |                              |                                                                   | potent antimalarial activity (IC <sub>50</sub> = 0.68 μM) ( <i>P. falciparum</i> 3D7)                                                                                                                        |          |
| 169 | demethylucilactaene        |                              |                                                                   | antimalarial activity (IC <sub>50</sub> = 43.9 μM) ( <i>P. falciparum</i> 3D7)                                                                                                                               |          |
| 170 | (8Z)-demethylucilactaene   |                              |                                                                   | weak antimalarial activity ( <i>P. falciparum</i> 3D7)                                                                                                                                                       |          |
| 171 | prelucilactaene G          |                              |                                                                   | antimalarial activity (IC <sub>50</sub> = 13.3 μM) ( <i>P. falciparum</i> 3D7)                                                                                                                               |          |

|     |                         |                          |   |                                                                                                                                                                                |       |
|-----|-------------------------|--------------------------|---|--------------------------------------------------------------------------------------------------------------------------------------------------------------------------------|-------|
| 172 | prelucilactaene H       |                          |   | antimalarial activity (IC <sub>50</sub> = 15.6 μM) ( <i>P. falciparum</i> 3D7)                                                                                                 |       |
| 173 | prelucilactaene A       |                          |   | antimalarial activity (IC <sub>50</sub> = 15.2 μM) ( <i>P. falciparum</i> 3D7)                                                                                                 |       |
| 174 | prelucilactaene B       |                          |   | antimalarial activity (IC <sub>50</sub> = 26.9 μM) ( <i>P. falciparum</i> 3D7)                                                                                                 | [101] |
| 175 | prelucilactaene E       |                          |   | antimalarial activity (IC <sub>50</sub> = 3.5 μM) ( <i>P. falciparum</i> 3D7)                                                                                                  |       |
| 176 | prelucilactaene F       |                          |   | antimalarial activity (IC <sub>50</sub> = 4.3 μM) ( <i>P. falciparum</i> 3D7)                                                                                                  |       |
| 177 | apicidin                |                          |   |                                                                                                                                                                                |       |
| 178 | apicidin A              |                          |   |                                                                                                                                                                                |       |
| 179 | apicidin B              |                          |   |                                                                                                                                                                                |       |
| 180 | apicidin C              |                          |   |                                                                                                                                                                                | [102] |
| 181 | apicidin D <sub>1</sub> | <i>F. pallidoroeseum</i> |   | antimalarial activity ( <i>Plasmodium berghei</i> )                                                                                                                            | [103] |
| 182 | apicidin D <sub>2</sub> | <i>F. fujikuroi</i>      | - |                                                                                                                                                                                | [104] |
| 183 | apicidin D <sub>3</sub> |                          |   |                                                                                                                                                                                |       |
| 184 | apicidin E              |                          |   |                                                                                                                                                                                |       |
| 185 | apicidin F              |                          |   | The determined IC <sub>50</sub> value of 0.67 μM (average of two replicates) is about 3-fold higher compared to the IC <sub>50</sub> value of apicidin, which is about 0.2 μM. | [105] |



## References

1. Chen, J.; Bai, X.; Hua, Y.; Zhang, H.; Wang, H. Fusariumins C and D, two novel antimicrobial agents from *Fusarium oxysporum* ZYP-R1 symbiotic on *Rumex madaio* Makino. *Fitoterapia* **2019**, *134*, 1-4, doi:10.1016/j.fitote.2019.01.016.
2. Brill, G.M.; Kati, W.M.; Montgomery, D.; Karwowski, J.P.; Humphrey, P.E.; Jackson, M.; Clement, J.J.; Kadam, S.; Chen, R.H.; McAlpine, J.B. Novel triterpene sulfates from *Fusarium compactum* using a rhinovirus 3C protease inhibitor screen. *J. Antibiot (Tokyo)*. **1996**, *49*, 541-546, doi:10.7164/antibiotics.49.541.
3. Zaher, A.M.; Makboul, M.A.; Moharram, A.M.; Tekwani, B.L.; Calderon, A.I. A new enniatin antibiotic from the endophyte *Fusarium tricinctum* Corda. *J. Antibiot (Tokyo)*. **2015**, *68*, 197-200, doi:10.1038/ja.2014.129.
4. Tomoda, H.; Nishida, H.; Huang, X.-H.; Masuma, R.; Kim, Y.K.; Omura, S. New cyclodepsipeptides, enniatins D, E and f produced by *Fusarium* sp. FO-1305Äü. *J. Antibiot (Tokyo)*. **1992**, *45*, 1207-1215.
5. Shi, S.; Li, Y.; Ming, Y.; Li, C.; Li, Z.; Chen, i.; Luo, M. Biological activity and chemical composition of the endophytic fungus *Fusarium* sp. TP-G1 obtained from the root of *Dendrobium officinale* Kimura et Migo. *Rec. Nat. Prod.* **2018**, *12*, 549-556, doi:10.25135/rnp.62.17.12.201.
6. Inokoshi, J.; Shigeta, N.; Fukuda, T.; Uchida, R.; Nonaka, K.; Masuma, R.; Tomoda, H. Epi-trichosetin, a new undecaprenyl pyrophosphate synthase inhibitor, produced by *Fusarium oxysporum* FKI-4553. *J. Antibiot (Tokyo)*. **2013**, *66*, 549-554, doi:10.1038/ja.2013.44.
7. Du, Z.; Song, C.; Yu, B.; Luo, X. Secondary metabolites produced by *Fusarium* sp. 2TnP1-2, an endophytic fungus from *Trewia nudiflora*. *Chin. J. Med. Chem.* **2008**, *18*, 452-456.
8. Nenkep, V.; Yun, K.; Son, B.W. Oxysporizoline, an antibacterial polycyclic quinazoline alkaloid from the marine-mudflat-derived fungus *Fusarium oxysporum*. *J. Antibiot (Tokyo)*. **2016**, *69*, 709-711, doi:10.1038/ja.2015.137.
9. Nenkep, V.; Yun, K.; Zhang, D.; Choi, H.D.; Kang, J.S.; Son, B.W. Induced production of bromomethylchlamydosporols A and B from the marine-derived fungus *Fusarium tricinctum*. *J. Nat. Prod.* **2010**, *73*, 2061-2063, doi:10.1021/np1005289.
10. Alfattani, A.; Marcourt, L.; Hofstetter, V.; Queiroz, E.F.; Leoni, S.; Allard, P.M.; Gindro, K.; Stien, D.; Perron, K.; Wolfender, J.L. Combination of pseudo-LC-NMR and HRMS/MS-based molecular networking for the rapid identification of antimicrobial metabolites from *Fusarium petrophilum*. *Front. Mol. Biosci.* **2021**, *8*, 725691-725715, doi:10.3389/fmolb.2021.725691.
11. Baker, R.A.; Tatum, J.H.; Nemec Jr, S. Antimicrobial activity of naphthoquinones from Fusaria. *Mycopathologia* **1990**, *111*, 9-15, doi:10.1007/bf02277294.
12. Trisuwat, K.; Khamthong, N.; Rukachaisirikul, V.; Phongpaichit, S.; Preedanon, S.; Sakayaroj, J. Anthraquinone, cyclopentanone, and naphthoquinone derivatives from the sea fan-derived fungi *Fusarium* spp. PSU-F14 and PSU-F135. *J. Nat. Prod.* **2010**, *73*, 1507-1511, doi:10.1021/np100282k.
13. Kornsakulnarn, J.; Dolsophon, K.; Boonyuen, N.; Boonruangprapa, T.; Rachatawee, P.; Prabpai, S.; Kongsaree, P.; Thongpanchang, C. Dihydronaphthalenones from endophytic fungus *Fusarium* sp. BCC14842. *Tetrahedron* **2011**, *67*, 7540-7547, doi:10.1016/j.tet.2011.07.078.

14. Shah, A.; Rather, M.A.; Hassan, Q.P.; Aga, M.A.; Mushtaq, S.; Shah, A.M.; Hussain, A.; Baba, S.A.; Ahmad, Z. Discovery of anti-microbial and anti-tubercular molecules from *Fusarium solani*: an endophyte of *Glycyrrhiza glabra*. *J. Appl. Microbiol.* **2017**, *122*, 1168-1176, doi:10.1111/jam.13410.
15. Chen, C.; Luo, X.; Li, K.; Guo, C.; Li, J.; Lin, X. Antibacterial secondary metabolites from a marine sponge-derived fungus *Fusarium equiseti* SCSIO 41019. *Chin. J. Antibiot.* **2019**, *44*, 1035-1040, doi:10.13461/j.cnki.cja.006629.
16. Wang, J.; Lu, W.; Min, C. The endophytic fungus AGR12 in the stem of *Rhizophora stylosa* Griff and its antibacterial metabolites. *Chin. J. Antibiot.* **2011**, *36*, 102-106.
17. Wang, Q.X.; Li, S.F.; Zhao, F.; Dai, H.Q.; Bao, L.; Ding, R.; Gao, H.; Zhang, L.X.; Wen, H.A.; Liu, H.W. Chemical constituents from endophytic fungus *Fusarium oxysporum*. *Fitoterapia* **2011**, *82*, 777-781, doi:10.1016/j.fitote.2011.04.002.
18. Mohamed, G.A.; Ibrahim, S.R.M.; Alhakamy, N.A.; Aljohani, O.S. Fusaroxazin, a novel cytotoxic and antimicrobial xanthone derivative from *Fusarium oxysporum*. *Nat. Prod. Res.* **2022**, *36*, 952-960, doi:10.1080/14786419.2020.1855165.
19. Renner, M.K.; Jensen, P.R.; Fenical, W. Neomangicols: structures and absolute stereochemistries of unprecedented halogenated sesterterpenes from a marine fungus of the genus *Fusarium*. *J. Org. Chem.* **1998**, *63*, 8346-8354, doi:10.1021/jo981226b.
20. Li, S.; Shao, M.-W.; Lu, Y.-H.; Kong, L.-C.; Jiang, D.-H.; Zhang, Y.-L. Phytotoxic and antibacterial metabolites from *Fusarium proliferatum* ZS07 isolated from the gut of Long-horned Grasshoppers. *J. Agric. Food Chem.* **2014**, *62*, 8997-9001, doi:10.1021/jf502484n.
21. Jiang, C.X.; Li, J.; Zhang, J.M.; Jin, X.J.; Yu, B.; Fang, J.G.; Wu, Q.X. Isolation, identification, and activity evaluation of chemical constituents from soil fungus *Fusarium avenaceum* SF-1502 and endophytic fungus *Fusarium proliferatum* AF-04. *J. Agric. Food Chem.* **2019**, *67*, 1839-1846, doi:10.1021/acs.jafc.8b05576.
22. Hussain, H.; Drogies, K.-H.; Al-Harrasi, A.; Hassan, Z.; Shah, A.; Rana, U.A.; Green, I.R.; Draeger, S.; Schulz, B.; Krohn, K. Antimicrobial constituents from endophytic fungus *Fusarium* sp. *Asian Pac. J. Trop. Dis.* **2015**, *5*, 186-189, doi:10.1016/s2222-1808(14)60650-2.
23. Lu, W.; Zhu, G.; Yuan, W.; Han, Z.; Dai, H.; Basiony, M.; Zhang, L.; Liu, X.; Hsiang, T.; Zhang, J. Two novel aliphatic unsaturated alcohols isolated from a pathogenic fungus *Fusarium proliferatum*. *Synth. Syst. Biotechnol.* **2021**, *6*, 446-451, doi:10.1016/j.synbio.2021.10.001.
24. Wen, H.; Li, Y.; Liu, X.; Ye, W.; Yao, X.; Che, Y. Fusagerins A-F, new alkaloids from the fungus *Fusarium* sp. *Nat. Prod. Bioprospect.* **2015**, *5*, 195-203, doi:10.1007/s13659-015-0067-1.
25. Kılıç, G.; Tosun, G.; Bozdeveci, A.; Erik, İ.; Öztürk, E.; Reis, R.; Sipahi, H.; Cora, M.; Karaoğlu, Ş.A.; Yaylı, N. Antimicrobial, cytotoxic, antiviral effects, and apectroscopic characterization of metabolites produced by *fusarium oxysporum* YP9B. *Rec. Nat. Prod.* **2021**, *15*, 547-567, doi:10.25135/rnp.208.20.06.1674.
26. Valla, A.; Giraud, M.; Labia, R.; Morand, A. In vitro inhibitory activity against bacteria of a fusarium mycotoxin and new synthetic derivatives. *Bull. Soc. Chim. Fr.* **1997**, *6*, 601-603.
27. Kyekyeku, J.O.; Kusari, S.; Adosraku, R.K.; Bullach, A.; Golz, C.; Strohmman, C.; Spiteller, M. Antibacterial secondary metabolites from an endophytic fungus, *Fusarium solani* JK10. *Fitoterapia* **2017**, *119*, 108-114, doi:10.1016/j.fitote.2017.04.007.

28. Sibero, M.T.; Zhou, T.; Fukaya, K.; Urabe, D.; Radjasa, O.K.K.; Sabdono, A.; Trianto, A.; Igarashi, Y. Two new aromatic polyketides from a sponge-derived *Fusarium*. *Beilstein. J. Org. Chem.* **2019**, *15*, 2941-2947, doi:10.3762/bjoc.15.289.
29. Tsuchinari, M.; Shimanuki, K.; Hiramatsu, F.; Murayama, T.; Koseki, T.; Shiono, Y. Fusapyridons A and B, novel pyridone alkaloids from an endophytic fungus, *Fusarium* sp. YG-45. *Z. Naturforsch. B.* **2007**, *62*, 1203-1207, doi:10.1515/znb-2007-0916.
30. Supratman, U.; Hirai, N.; Sato, S.; Watanabe, K.; Malik, A.; Annas, S.; Harneti, D.; Maharani, R.; Koseki, T.; Shiono, Y. New naphthoquinone derivatives from *Fusarium napiforme* of a mangrove plant. *Nat. Prod. Res.* **2021**, *35*, 1406-1412, doi:10.1080/14786419.2019.1650358.
31. Khan, N.; Afroz, F.; Begum, M.N.; Roy Rony, S.; Sharmin, S.; Moni, F.; Mahmood Hasan, C.; Shaha, K.; Sohrab, M.H. Endophytic *Fusarium solani*: A rich source of cytotoxic and antimicrobial naphthoquinone and aza-anthraquinone derivatives. *Toxicol. Rep.* **2018**, *5*, 970-976, doi:10.1016/j.toxrep.2018.08.016.
32. Haraguchi, H.; Yokoyama, K.; Oike, S.; Ito, M.; Nozaki, H. Respiratory stimulation and generation of superoxide radicals in *Pseudomonas aeruginosa* by fungal naphthoquinones. *Arch. Microbiol.* **1997**, *167*, 6-10, doi:10.1007/s002030050409.
33. Yan, C.; Liu, W.; Li, J.; Deng, Y.; Chen, S.; Liu, H. Bioactive terpenoids from *Santalum album* derived endophytic fungus *Fusarium* sp. YD-2. *RSC. Adv.* **2018**, *8*, 14823-14828, doi:10.1039/c8ra02430h.
34. Zhang, J.; Liu, D.; Wang, H.; Liu, T.; Xin, Z. Fusartricin, a sesquiterpenoid ether produced by an endophytic fungus *Fusarium tricinctum* Salicorn 19. *Eur. Food Res. Technol.* **2014**, *240*, 805-814, doi:10.1007/s00217-014-2386-6.
35. Dong, J.W.; Cai, L.; Li, X.J.; Duan, R.T.; Shu, Y.; Chen, F.Y.; Wang, J.P.; Zhou, H.; Ding, Z.T. Production of a new tetracyclic triterpene sulfate metabolite sambacide by solid-state cultivated *Fusarium sambucinum* B10.2 using potato as substrate. *Bioresour. Technol.* **2016**, *218*, 1266-1270, doi:10.1016/j.biortech.2016.07.014.
36. Shu, R.; Wang, F.; Yang, Y.; Liu, Y.; Tan, R. Antibacterial and xanthine oxidase inhibitory cerebrosides from *Fusarium* sp. IFB-121, and endophytic fungus in *Quercus variabilis*. *Lipids* **2004**, *39*, 667-673, doi:10.1007/s11745-004-1280-9.
37. Sebastià, N.; Meca, G.; Soriano, J.M.; Mañes, J. Antibacterial effects of enniatins J(1) and J(3) on pathogenic and lactic acid bacteria. *Food Chem. Toxicol.* **2011**, *49*, 2710-2717, doi:10.1016/j.fct.2011.06.070.
38. Chen, C.; Imamura, N.; Nishijima, M.; Adachi, K.; Sakai, M.; Sano, H. Halymecins, new antimicroalgal substances produced by fungi isolated from marine algae. *J. Antibiot (Tokyo)*. **1996**, *49*, 998-1005, doi:10.7164/antibiotics.49.998.
39. Shiono, Y.; Shibuya, F.; Murayama, T.; Koseki, T.; Poumale, H.M.P.; Ngadjui, B.T. A polyketide metabolite from an endophytic *Fusarium equiseti* in a medicinal plant. *Z. Naturforsch. B.* **2013**, *68*, 289-292, doi:10.5560/znb.2013-3014.
40. Jackson, M.; Frost, D.J.; Karwowski, J.P.; Humphrey, P.E.; Dahod, S.K.; Choi, W.S.; Brandt, K.; Malmberg, L.-H.; Rasmussen, R.R.; Scherr, M.H. Fusacandins A and B; novel antifungal antibiotics of the pululacandin class from *Fusarium sambucinum* *J. Antibiot (Tokyo)*. **1995**, *48*, 608-613, doi:10.7164/antibiotics.48.608.

41. Chen, R.H.; Tennant, S.; Frost, D.; O'beirne, M.J.; Karwowski, J.P.; Humphrey, P.E.; Malmberg, L.-H.; Choi, W.; Brandt, K.D.; West, P. Discovery of saricandin, a novel papulacandin, from a *Fusarium* species. *J. Antibiot (Tokyo)*. **1996**, *49*, 596-598, doi:10.7164/antibiotics.49.596.
42. Brady, S.F.; Clardy, J. CR377, a new pentaketide antifungal agent isolated from an endophytic fungus. *J. Nat. Prod.* **2000**, *63*, 1447-1448, doi:10.1021/np990568p.
43. Arunpanichlert, J.; Rukachaisirikul, V.; Sukpondma, Y.; Phongpaichit, S.; Supaphon, O.; Sakayaroj, J. A  $\beta$ -resorcylic macrolide from the seagrass-derived fungus *Fusarium* sp. PSU-ES73. *Arch. Pharm. Res.* **2011**, *34*, 1633-1637, doi:10.1007/s12272-011-1007-1.
44. Saetang, P.; Rukachaisirikul, V.; Phongpaichit, S.; Sakayaroj, J.; Shi, X.; Chen, J.; Shen, X.  $\beta$ -Resorcylic macrolide and octahydronaphthalene derivatives from a seagrass-derived fungus *Fusarium* sp. PSU-ES123. *Tetrahedron* **2016**, *72*, 6421-6427, doi:10.1016/j.tet.2016.08.048.
45. Hiramatsu, F.; Miyajima, T.; Murayama, T.; Takahashi, K.; Koseki, T.; Shiono, Y. Isolation and structure elucidation of neofusapyrone from a marine-derived *Fusarium* species, and structural revision of fusapyrone and deoxyfusapyrone. *J. Antibiot (Tokyo)*. **2006**, *59*, 704-709, doi:10.1038/ja.2006.94.
46. Xu, X.; Zhao, S.; Yu, Y.; Chen, Z.; Shen, H.; Zhou, L. Beauvericin K, a new antifungal beauvericin analogue from a marine-derived *Fusarium* sp. *Nat. Prod. Commun.* **2016**, *11*, 1825–1826, doi:10.1177/1934578x1601101213.
47. Baráth, Z.; Baráthová, H.; Betina, V.; Nemec, P. Ramihyphins—Antifungal and morphogenic antibiotics from *Fusarium* sp. S-435. *Folia. Microbiol.* **1974**, *19*, 507-511, doi:10.1007/bf02872917.
48. Sawai, K.; Okuno, T.; Terada, Y.; Harada, Y.; Sawamura, K.; Sasaki, H.; Takao, S. Isolation and properties of two antifungal substances from *Fusarium solani*. *Agri. Biol. Chem.* **2014**, *45*, 1223-1228, doi:10.1080/00021369.1981.10864674.
49. Ibrahim, S.R.M.; Abdallah, H.M.; Elkhayat, E.S.; Al Musayeb, N.M.; Asfour, H.Z.; Zayed, M.F.; Mohamed, G.A. Fusaripeptide A: new antifungal and anti-malarial cyclodepsipeptide from the endophytic fungus *Fusarium* sp. *J. Asian. Nat. Prod. Res.* **2018**, *20*, 75-85, doi:10.1080/10286020.2017.1320989.
50. Overy, D.; Calati, K.; Kahn, J.N.; Hsu, M.J.; Martin, J.; Collado, J.; Roemer, T.; Harris, G.; Parish, C.A. Isolation and structure elucidation of parnafungins C and D, isoxazolidinone-containing antifungal natural products. *Bioorg. Med. Chem. Lett.* **2009**, *19*, 1224-1227, doi:10.1016/j.bmcl.2008.12.081.
51. Parish, C.A.; Smith, S.K.; Calati, K.; Zink, D.; Wilson, K.; Roemer, T.; Jiang, B.; Xu, D.; Bills, G.; Platas, G. Isolation and structure elucidation of parnafungins, antifungal natural products that inhibit mRNA polyadenylation. *J. Am. Chem. Soc.* **2008**, *130*, 7060-7066, doi:10.1021/ja711209p.
52. McBrien, K.D.; Gao, Q.; Huang, S.; Klotz, S.E.; Wang, R.R.; Pirnik, D.M.; Neddermann, K.M.; Bursuker, I.; Kadow, K.F.; Leet, J.E. Fusaricide, a new cytotoxic *N*-hydroxypyridone from *Fusarium* sp. *J. Nat. Prod.* **1996**, *59*, 1151-1153, doi:10.1021/np960521t.
53. Hilário, F.; Chapla, V.; Araujo, A.; Sano, P.; Bauab, T.; dos Santos, L. Antimicrobial screening of endophytic fungi isolated from the aerial parts of *Paepalanthus chiquitensis* (Eriocaulaceae) led to the isolation of secondary metabolites produced by *Fusarium fujikuroi*. *J. Braz. Chem. Soc.* **2016**, *28*, 1389-1395, doi:10.21577/0103-5053.20160312.
54. M. Ibrahim, S.; Mohamed, G.; Khayat, M.; Al Haidari, R.; El-Kholy, A.; Zayed, M. A new antifungal aminobenzamide derivative from the endophytic fungus *Fusarium* sp. *Pharmacogn.*

*Mag.* **2019**, *15*, 204-207, doi:10.4103/pm.pm\_476\_18.

55. Sakai, K.; Unten, Y.; Iwatsuki, M.; Matsuo, H.; Fukasawa, W.; Hirose, T.; Chinen, T.; Nonaka, K.; Nakashima, T.; Sunazuka, T.; et al. Fusaramin, an antimitochondrial compound produced by *Fusarium* sp., discovered using multidrug-sensitive *Saccharomyces cerevisiae*. *J. Antibiot (Tokyo)*. **2019**, *72*, 645-652, doi:10.1038/s41429-019-0197-5.
56. Jayasinghe, L.; Abbas, H.K.; Jacob, M.R.; Herath, W.H.; Nanayakkara, N.D. *N*-Methyl-4-hydroxy-2-pyridinone analogues from *Fusarium oxysporum*. *J. Nat. Prod.* **2006**, *69*, 439-442.
57. Strongman, D.; Miller, J.; Calhoun, L.; Findlay, J.; Whitney, N. The biochemical basis for interference competition among some lignicolous marine fungi. *Bot. Mar.* **1987**, *30*, 21-26, doi:10.1515/botm.1987.30.1.21.
58. Pedersen, P.B.; Miller, J.D. The fungal metabolite culmorin and related compounds. *Nat. Toxins* **1999**, *7*, 305-309, doi:10.1002/1522-7189(199911/12)7:6<305::aid-nt72>3.0.co;2-g.
59. Arnstein, H.; Cook, A. Javanicin. An antibacterial pigment from *Fusarium javanicum*. *J. Chem. Soc.* **1947**, 1021-1028.
60. Kurobane, I.; Zaita, N.; Fukuda, a. New metabolites of *Fusarium martii* related to dihydrofusarubin. *J. Antibiot (Tokyo)*. **1986**, *39*, 205-214, doi:10.7164/antibiotics.39.205.
61. Deshmukh, R.; Mathew, A.; Purohit, H.J. Characterization of antibacterial activity of bikaverin from *Fusarium* sp. HKF15. *J. Biosci. Bioeng.* **2014**, *117*, 443-448, doi:10.1016/j.jbiosc.2013.09.017.
62. Limón, M.C.; Rodríguez-Ortiz, R.; Avalos, J. Bikaverin production and applications. *Appl. Microbiol. Biotechnol.* **2010**, *87*, 21-29, doi:10.1007/s00253-010-2551-1.
63. Ariantari, N.P.; Frank, M.; Gao, Y.; Stuhldreier, F.; Kiffe-Delf, A.-L.; Hartmann, R.; Höfert, S.-P.; Janiak, C.; Wesselborg, S.; Müller, W.E.G.; et al. Fusaristatins D–F and (7S,8R)-(–)-chlamydospordioid from *Fusarium* sp. BZCB-CA, an endophyte of *Bothriospermum chinense*. *Tetrahedron* **2021**, *85*, 132065-132071, doi:10.1016/j.tet.2021.132065.
64. Ola, A.R.B.; Thomy, D.; Lai, D.; Brötz-Oesterhelt, H.; Proksch, P. Inducing secondary metabolite production by the endophytic fungus *Fusarium tricinctum* through coculture with *Bacillus subtilis*. *J. Nat. Prod.* **2013**, *76*, 2094-2099, doi:10.1021/np400589h.
65. Bushnell, G.W.; Li, Y.-L.; Poulton, G.A. Pyrones. X. Lateropyrone, a new antibiotic from the fungus *Fusarium lateritium* Nees. *Can. J. Chem.* **1984**, *62*, 2101-2106, doi:10.1139/v84-358.
66. Clark, T.N.; Carroll, M.; Ellsworth, K.; Guerrette, R.; Robichaud, G.A.; Johnson, J.A.; Gray, C.A. Antibiotic mycotoxins from an endophytic *Fusarium acuminatum* isolated from the medicinal plant *Geum macrophyllum*. *Nat. Prod. Commun.* **2018**, *13*, 1934578X1801301017, doi:10.1177/1934578x1801301017.
67. Okada, H.; Nagashima, M.; Suzuki, H.; Nakajima, S.; Kojiri, K.; Suda, H. BE-29602, a new member of the papulacandin family. *J. Antibiot (Tokyo)*. **1996**, *49*, 103-106, doi:10.7164/antibiotics.49.103.
68. Kobayashi, H.; Sunaga, R.; Furihata, K.; Morisaki, N.; Iwasaki, S. Isolation and structures of an antifungal antibiotic, fusarielin A, and related compounds produced by a *Fusarium* sp. *J. Antibiot (Tokyo)*. **1995**, *48*, 42-52, doi:10.7164/antibiotics.48.42.
69. Liang, X.A.; Ma, Y.M.; Zhang, H.C.; Liu, R. A new helvolic acid derivative from an endophytic *Fusarium* sp. of *Ficus carica*. *Nat. Prod. Res.* **2016**, *30*, 2407-2412, doi:10.1080/14786419.2016.1190722.

70. Janevska, S.; Arndt, B.; Niehaus, E.-M.; Burkhardt, I.; Rösler, S.M.; Brock, N.L.; Humpf, H.-U.; Dickschat, J.S.; Tudzynski, B. Gibepyrone biosynthesis in the rice pathogen *Fusarium fujikuroi* is facilitated by a small polyketide synthase gene cluster. *J. Biol. Chem.* **2016**, *291*, 27403-27420, doi:10.1074/jbc.m116.753053.
71. Zhou, G.; Qiao, L.; Zhang, X.; Sun, C.; Che, Q.; Zhang, G.; Zhu, T.; Gu, Q.; Li, D. Fusaricates H-K and fusolanones A-B from a mangrove endophytic fungus *Fusarium solani* HDN15-410. *Phytochemistry* **2019**, *158*, 13-19, doi:10.1016/j.phytochem.2018.10.035.
72. Evidente, A.; Conti, L.; Altomare, C.; Bottalico, A.; Sindona, G.; Segre, A.L.; Logrieco, A. Fusapyrone and deoxyfusapyrone, two antifungal  $\alpha$ -pyrones from *Fusarium semitectum*. *Nat. Toxins* **1994**, *2*, 4-13, doi:10.1002/nt.2620020103.
73. Altomare, C.; Perrone, G.; Zonno, M.C.; Evidente, A.; Pengue, R.; Fanti, F.; Polonelli, L. Biological characterization of fusapyrone and deoxyfusapyrone, two bioactive secondary metabolites of *Fusarium semitectum*. *J. Nat. Prod.* **2000**, *63*, 1131-1135.
74. Son, S.; Kim, H.; Choi, G.; Lim, H.; Jang, K.; Lee, S.; Lee, S.; Sung, N.; Kim, J.C. Bikaverin and fusaric acid from *Fusarium oxysporum* show antioomycete activity against *Phytophthora infestans*. *J. Appl. Microbiol.* **2008**, *104*, 692-698, doi:10.1111/j.1365-2672.2007.03581.x.
75. Bacon, C.W.; Hinton, D.M.; Hinton, A., Jr. Growth-inhibiting effects of concentrations of fusaric acid on the growth of *Bacillus mojavensis* and other biocontrol *Bacillus* species. *J. Appl. Microbiol.* **2006**, *100*, 185-194, doi:10.1111/j.1365-2672.2005.02770.x.
76. Poleto, L.; da Rosa, L.O.; Fontana, R.C.; Rodrigues, E.; Poletto, E.; Baldo, G.; Paesi, S.; Sales-Campos, C.; Camassola, M. Production of antimicrobial metabolites against pathogenic bacteria and yeasts by *Fusarium oxysporum* in submerged culture processes. *Bioproc. Biosyst. Eng.* **2021**, *44*, 1321-1332, doi:10.1007/s00449-021-02538-2.
77. Vesonder, R.F.; Tjarks, L.w.; Rohwedder, W.K.; Burmeister, H.R.; Laugal, J.A. Equisetin, an antibiotic from *Fusarium equisetin* NRRL 5537, identified as a derivative of *N*-methyl-2, 4-pyrrolidone. *J. Antibiot (Tokyo)*. **1979**, *32*, 759-761, doi:10.7164/antibiotics.32.759.
78. Whitt, J.; Shipley, S.M.; Newman, D.J.; Zuck, K.M. Tetramic Acid Analogues Produced by Coculture of *Saccharopolyspora erythraea* with *Fusarium pallidoroseum*. *J. Nat. Prod.* **2014**, *77*, 173-177, doi:10.1021/np400761g.
79. Ratnaweera, P.B.; de Silva, E.D.; Williams, D.E.; Andersen, R.J. Antimicrobial activities of endophytic fungi obtained from the arid zone invasive plant *Opuntia dillenii* and the isolation of equisetin, from endophytic *Fusarium* sp. *Bmc. Complem. Altern. M.* **2015**, *15*, 220, doi:10.1186/s12906-015-0722-4.
80. Ibrahim, S.R.M.; Elkhayat, E.S.; Mohamed, G.A.A.; Fat'hi, S.M.; Ross, S.A. Fusarithioamide A, a new antimicrobial and cytotoxic benzamide derivative from the endophytic fungus *Fusarium chlamydosporium*. *Biochem. Biophys. Res. Commun.* **2016**, *479*, 211-216, doi:10.1016/j.bbrc.2016.09.041.
81. Ibrahim, S.R.M.; Mohamed, G.A.; Al Haidari, R.A.; Zayed, M.F.; El-Kholy, A.A.; Elkhayat, E.S.; Ross, S.A. Fusarithioamide B, a new benzamide derivative from the endophytic fungus *Fusarium chlamydosporium* with potent cytotoxic and antimicrobial activities. *Bioorg. Med. Chem.* **2018**, *26*, 786-790, doi:10.1016/j.bmc.2017.12.049.
82. Xu, L.; Wang, J.; Zhao, J.; Li, P.; Shan, T.; Wang, J.; Li, X.; Zhou, L. Beauvericin from the endophytic fungus, *Fusarium redolens*, isolated from *Dioscorea zingiberensis* and its antibacterial activity. *Nat. Prod. Commun.* **2010**, *5*, 1934578X1000500527.

83. Meca, G.; Sospedra, I.; Soriano, J.M.; Ritieni, A.; Moretti, A.; Manes, J. Antibacterial effect of the bioactive compound beauvericin produced by *Fusarium proliferatum* on solid medium of wheat. *Toxicon* **2010**, *56*, 349-354, doi:10.1016/j.toxicon.2010.03.022.
84. Jiang, Z.; Barret, M.-O.; Boyd, K.G.; Adams, D.R.; Boyd, A.S.; Burgess, J.G. JM47, a cyclic tetrapeptide HC-toxin analogue from a marine *Fusarium* species. *Phytochemistry* **2002**, *60*, 33-38, doi:10.1016/s0031-9422(02)00061-4.
85. Meca, G.; Sospedra, I.; Valero, M.A.; Manes, J.; Font, G.; Ruiz, M.J. Antibacterial activity of the enniatin B, produced by *Fusarium tricinctum* in liquid culture, and cytotoxic effects on Caco-2 cells. *Toxicol. Mech. Method.* **2011**, *21*, 503-512, doi:10.3109/15376516.2011.556202.
86. Firakova, S.; Šturdíková, M.; Liptaj, T.; Prónayová, N.; Bezáková, L.; Proksa, B. Enniatins produced by *Fusarium dimerum*, an endophytic fungal strain. *Pharmazie* **2008**, *63*, 539-541.
87. Tsantrizos, Y.S.; Xu, X.-J.; Sauriol, F.; Hynes, R.C. Novel quinazolinones and enniatins from *Fusarium lateritium* Nees. *Can. J. Chem.* **1993**, *71*, 1362-1367, doi:10.1139/v93-176.
88. Hawas, U.W.; Al-Farawati, R.; Abou El-Kassem, L.T.; Turki, A.J. Different culture metabolites of the Red Sea fungus *Fusarium equiseti* optimize the inhibition of Hepatitis C Virus NS3/4A Protease (HCV PR). *Mar. Drugs* **2016**, *14*, 190-201, doi:10.3390/md14100190.
89. Chang, S.; Yan, B.; Chen, Y.; Zhao, W.; Gao, R.; Li, Y.; Yu, L.; Xie, Y.; Si, S.; Chen, M. Cytotoxic hexadepsipeptides and anti-coronaviral 4-hydroxy-2-pyridones from an endophytic *Fusarium* sp. *Front. Chem.* **2022**, *10*, 1106869-1106877, doi:10.3389/fchem.2022.1106869.
90. McKee, T.C.; Bokesch, H.R.; McCormick, J.L.; Rashid, M.A.; Spielvogel, D.; Gustafson, K.R.; Alavanja, M.M.; Cardelline, J.H., 2nd; Boyd, M.R. Isolation and characterization of new anti-HIV and cytotoxic leads from plants, marine, and microbial organisms. *J. Nat. Prod.* **1997**, *60*, 431-438, doi:10.1021/np970031g.
91. Guo, Y.W.; Liu, X.J.; Yuan, J.; Li, H.J.; Mahmud, T.; Hong, M.J.; Yu, J.C.; Lan, W.J. L-Tryptophan induces a marine-derived *Fusarium* sp. to produce indole alkaloids with activity against the Zika Virus. *J. Nat. Prod.* **2020**, *83*, 3372-3380, doi:10.1021/acs.jnatprod.0c00717.
92. Nonaka, K.; Chiba, T.; Suga, T.; Asami, Y.; Iwatsuki, M.; Masuma, R.; Ōmura, S.; Shiomi, K. Coculnol, a new penicillic acid produced by a coculture of *Fusarium solani* FKI-6853 and *Talaromyces* sp. FKA-65. *J. Antibiot (Tokyo)*. **2015**, *68*, 530-532, doi:10.1038/ja.2015.15.
93. A. Abdelhakim, I.; Bin Mahmud, F.; Motoyama, T.; Futamura, Y.; Takahashi, S.; Osada, H. Dihydrolucilactaene, a potent antimalarial compound from *Fusarium* sp. RK97-94. *J. Nat. Prod.* **2021**, *85*, 63-69, doi:10.1021/acs.jnatprod.1c00677.
94. Balan, J.; Fuska, J.; Kuhr, I.; Kuhrová, V. Bikaverin, an antibiotic from *Gibberella fujikuroi*, effective against *Leishmania brasiliensis*. *Folia Microbiol.* **1970**, *15*, 479-484, doi:10.1007/bf02880192.
95. Campos, F.F.; Sales Junior, P.A.; Romanha, A.J.; Araújo, M.S.; Siqueira, E.P.; Resende, J.M.; Alves, T.; Martins-Filho, O.A.; Santos, V.L.d.; Rosa, C.A. Bioactive endophytic fungi isolated from *Caesalpinia echinata* Lam.(Brazilwood) and identification of beauvericin as a trypanocidal metabolite from *Fusarium* sp. *Mem. Inst. Oswaldo Cruz* **2015**, *110*, 65-74, doi:10.1590/0074-02760140243.
96. Nascimento, A.M.d.; Conti, R.; Turatti, I.C.; Cavalcanti, B.C.; Costa-Lotufo, L.V.; Pessoa, C.; Moraes, M.O.d.; Manfrim, V.; Toledo, J.S.; Cruz, A.K. Bioactive extracts and chemical

constituents of two endophytic strains of *Fusarium oxysporum*. *Rev. Bras. Farmacogn.* **2012**, *22*, 1276-1281, doi:10.1590/s0102-695x2012005000106.

97. Tadpetch, K.; Chukong, C.; Jeanmard, L.; Thiraporn, A.; Rukachaisirikul, V.; Phongpaichit, S.; Sakayaroj, J. Cytotoxic naphthoquinone and a new succinate ester from the soil fungus *Fusarium solani* PSU-RSPG227. *Phytochem. Lett.* **2015**, *11*, 106-110, doi:10.1016/j.phytol.2014.11.018.
98. Ibrahim, S.R.; Mohamed, G.A.; Ross, S.A. Integracides F and G: New tetracyclic triterpenoids from the endophytic fungus *Fusarium* sp. *Phytochem. Lett.* **2016**, *15*, 125-130, doi:10.1016/j.phytol.2015.12.010.
99. Ibrahim, S.R.; Abdallah, H.M.; Mohamed, G.A.; Ross, S.A. Integracides HJ: New tetracyclic triterpenoids from the endophytic fungus *Fusarium* sp. *Fitoterapia* **2016**, *112*, 161-167, doi:10.1016/j.fitote.2016.06.002.
100. Kato, S.; Motoyama, T.; Futamura, Y.; Uramoto, M.; Nogawa, T.; Hayashi, T.; Hirota, H.; Tanaka, A.; Takahashi-Ando, N.; Kamakura, T. Biosynthetic gene cluster identification and biological activity of lucilactaene from *Fusarium* sp. RK97-94. *Biosci., Biotechnol., Biochem.* **2020**, *84*, 1303-1307, doi:10.1080/09168451.2020.1725419.
101. Abdelhakim, I.A.; Motoyama, T.; Nogawa, T.; Mahmud, F.B.; Futamura, Y.; Takahashi, S.; Osada, H. Isolation of new lucilactaene derivatives from P450 monooxygenase and aldehyde dehydrogenase knockout *Fusarium* sp. RK97-94 strains and their biological activities. *J. Antibiot (Tokyo)*. **2022**, *75*, 361-374, doi:10.1038/s41429-022-00529-3.
102. Singh, S.B.; Zink, D.L.; Polishook, J.D.; Dombrowski, A.W.; Darkin-Rattray, S.J.; Schmatz, D.M.; Goetz, M.A. Apicidins: Novel cyclic tetrapeptides as coccidiostats and antimalarial agents from *Fusarium pallidoroseum*. *Tetrahedron Lett.* **1996**, *37*, 8077-8080, doi:10.1016/0040-4039(96)01844-8.
103. Singh, S.B.; Zink, D.L.; Liesch, J.M.; Dombrowski, A.W.; Darkin-Rattray, S.J.; Schmatz, D.M.; Goetz, M.A. Structure, histone deacetylase, and antiprotozoal activities of apicidins B and C, congeners of apicidin with proline and valine substitutions. *Org. Lett.* **2001**, *3*, 2815-2818, doi:10.1021/ol016240g.
104. Niehaus, E.-M.; Janevska, S.; von Bargen, K.W.; Sieber, C.M.; Harrer, H.; Humpf, H.-U.; Tudzynski, B. Apicidin F: characterization and genetic manipulation of a new secondary metabolite gene cluster in the rice pathogen *Fusarium fujikuroi*. *PLoS one* **2014**, *9*, e103336, doi:10.1371/journal.pone.0103336.
105. Von Bargen, K.W.; Niehaus, E.-M.; Bergander, K.; Brun, R.; Tudzynski, B.; Humpf, H.-U. Structure elucidation and antimalarial activity of apicidin F: an apicidin-like compound produced by *Fusarium fujikuroi*. *J. Nat. Prod.* **2013**, *76*, 2136-2140, doi:10.1021/np4006053.
